# Supplementary material for: Development of trisubstituted thiophene-3-arboxamide selenide derivatives as novel EGFR kinase inhibitors with cytotoxic activity
Source: Royal Society of Chemistry journal article supplement (doi:10.1039/d3md00403a), 2023-01-01
Supplement: d3md00403a1.pdf [file d3md00403a1.pdf]

## **Development of Trisubstituted Thiophene-3-Carboxamide Selenide Derivatives as Novel EGFR Kinase Inhibitors with Cytotoxic Activity**

Priyanka N. Makhal<sup>a</sup>, Anika Sood<sup>b</sup>, Arbaz Sujat Shaikh<sup>a</sup>, Lahu N. Dayare<sup>a</sup>, Dharmendra Kumar Khatri<sup>b,\*</sup>, Venkata Rao Kaki<sup>a,\*</sup>

<sup>a</sup>*Department of Chemical Sciences, <sup>b</sup>Department of Pharmacology and Toxicology, National Institute of Pharmaceutical Education and Research (NIPER), Hyderabad-500037, India.*

### **Table of contents**

|                           |       |
|---------------------------|-------|
| 1. Drug response curve    | 2     |
| 2. Spectral data          | 3-29  |
| 3. HPLC method conditions | 30    |
| 4. HPLC results           | 31-35 |

# 1. Drug response curve

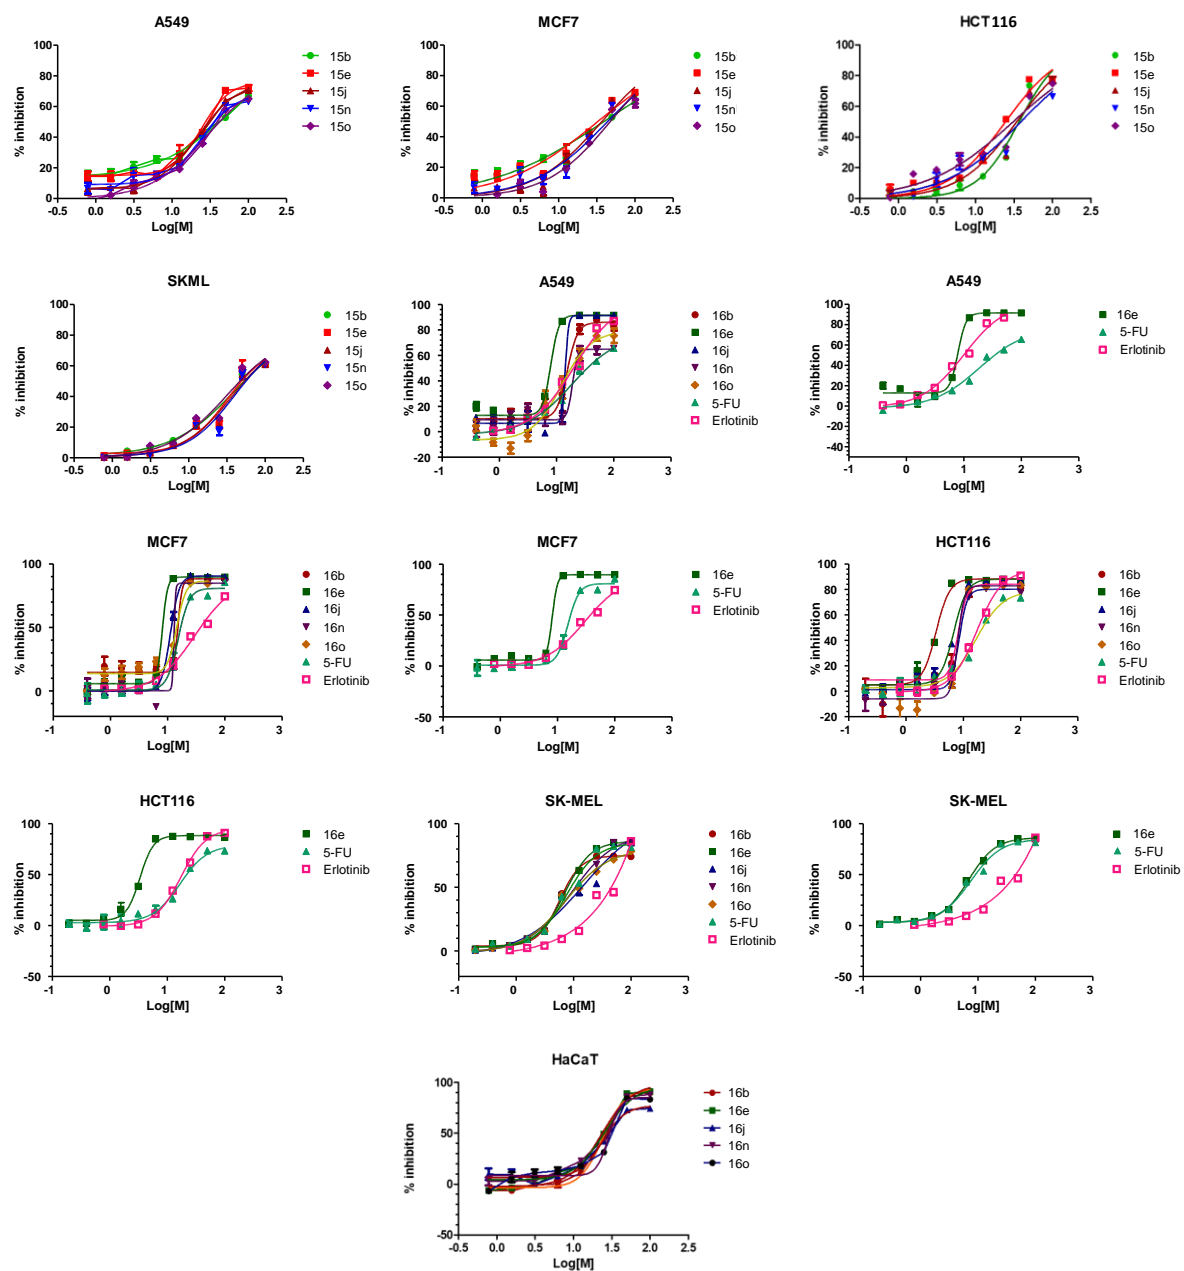

Figure S1: Concentration Response Curves of MTT data of compounds on different cell lines.

## 2. Spectral Data

### 19a: Ethyl 2-amino-5-methyl-4-phenylthiophene-3-carboxylate

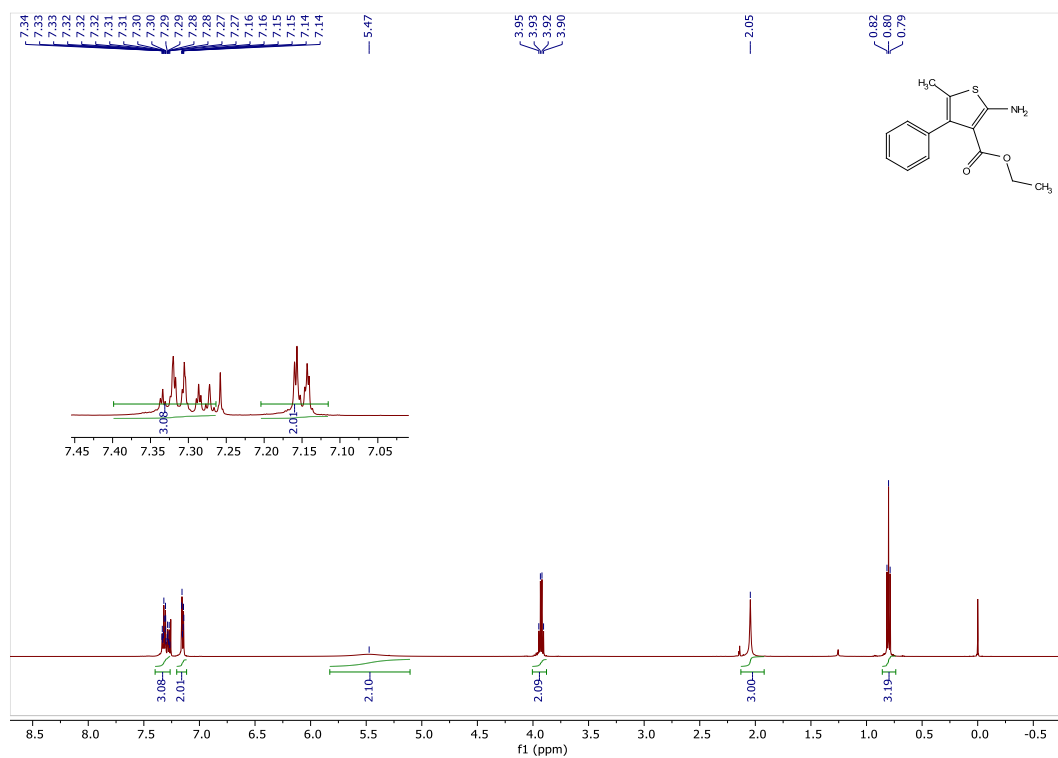

<sup>1</sup>H NMR spectrum of compound **19a** (CDCl<sub>3</sub>, 500 MHz)

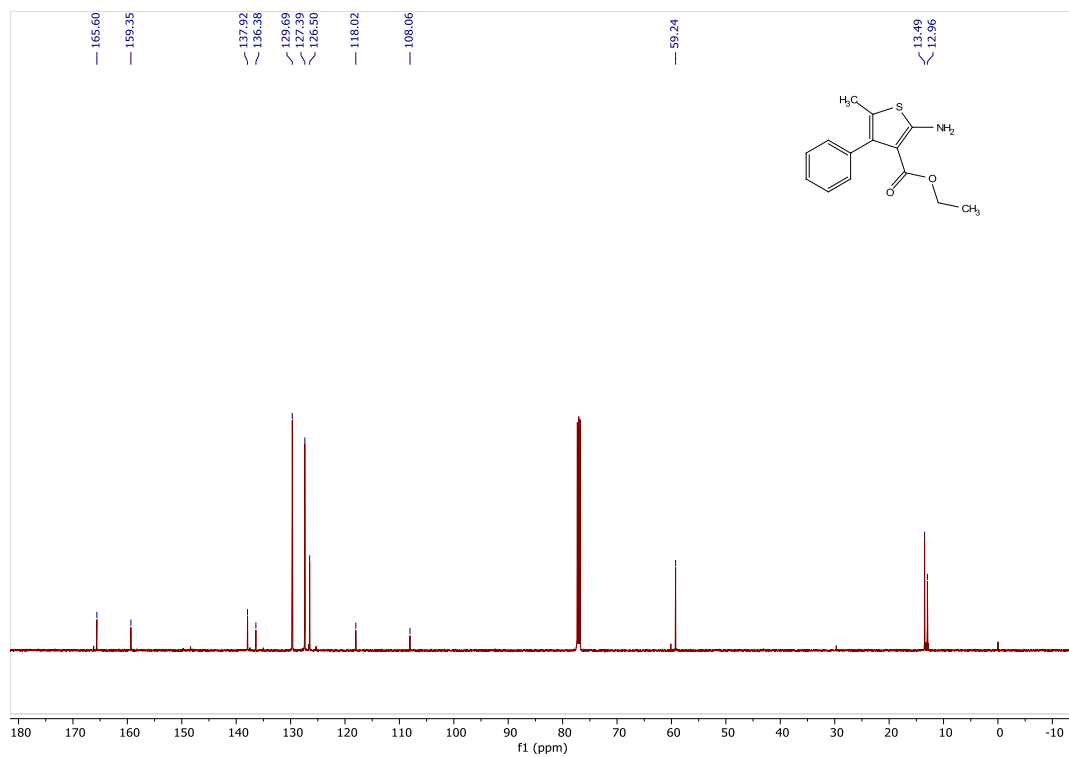

<sup>13</sup>C NMR spectrum of compound **19a** (CDCl<sub>3</sub>, 500 MHz)

**21a: 2-bromo-5-methyl-4-phenylthiophene-3-carboxylic acid**

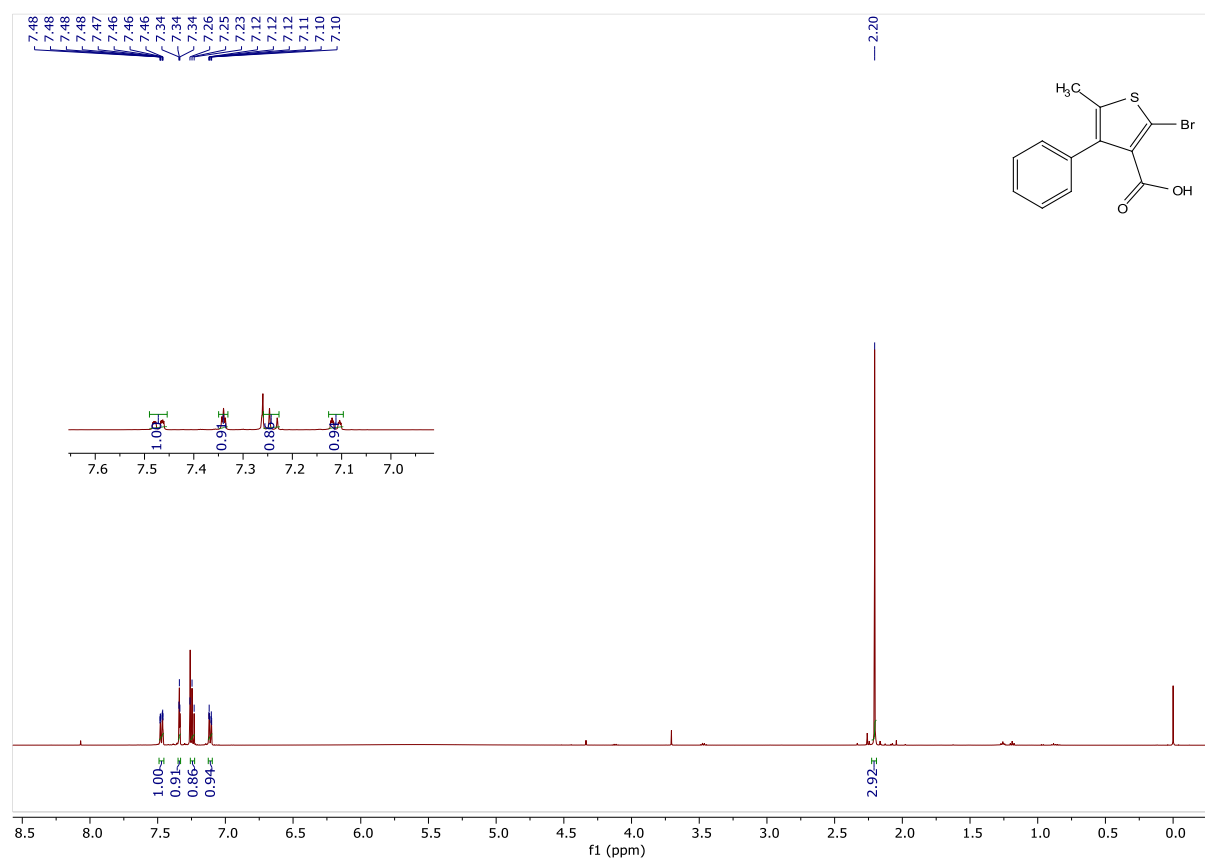

<sup>1</sup>H NMR spectrum of compound **21a** (CDCl<sub>3</sub>, 500 MHz)

**24b**: *tert*-butyl(1-oxo-1-(pyrrolidin-1-yl)propan-2-yl)carbamate

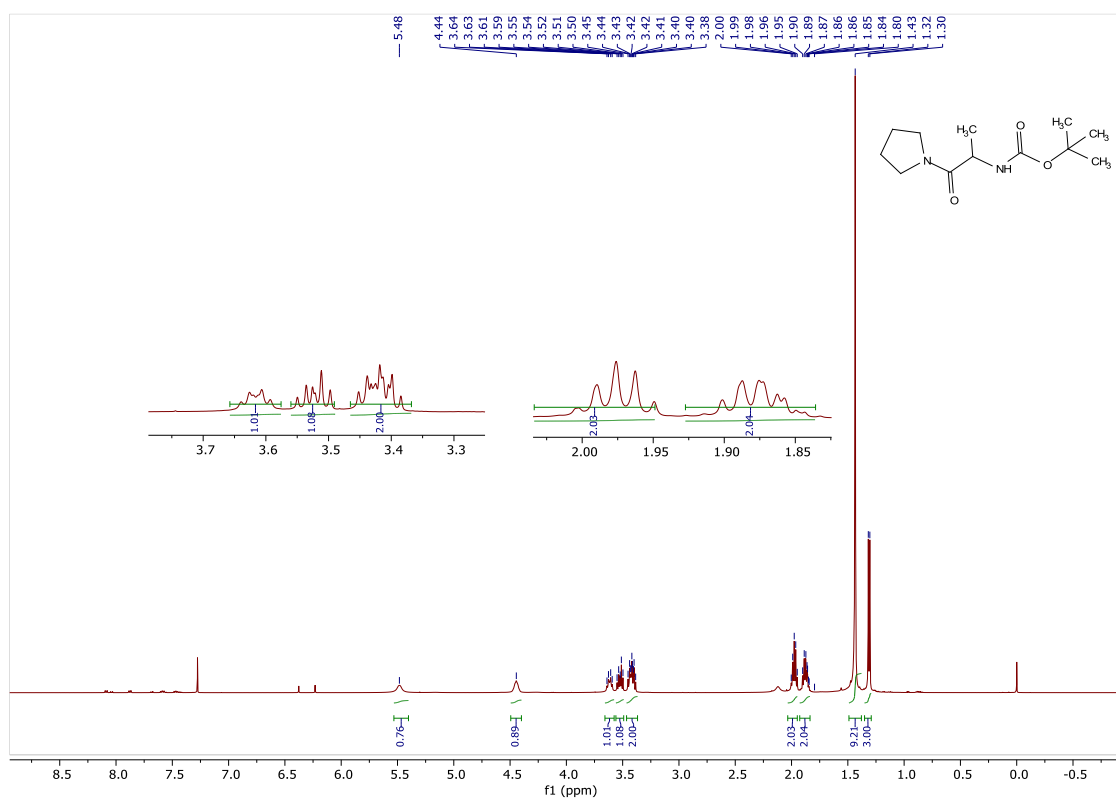

<sup>1</sup>H NMR spectrum of compound **24b** (CDCl<sub>3</sub>, 500 MHz)

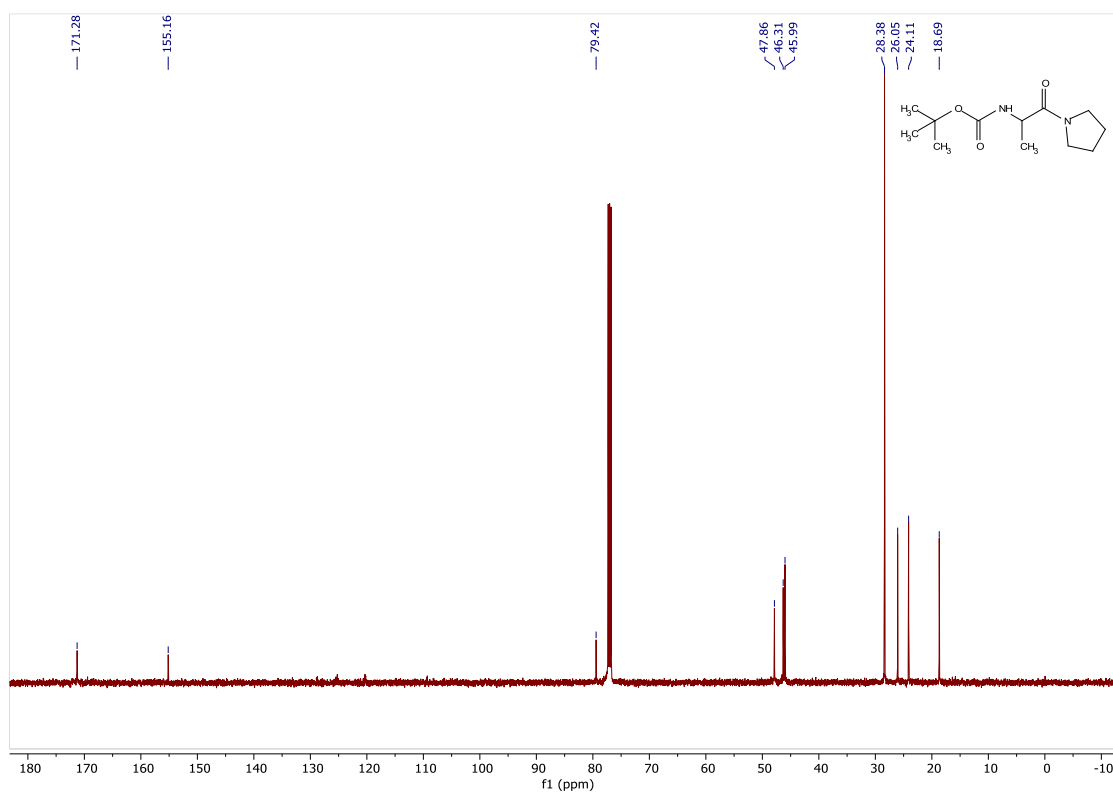

<sup>13</sup>C NMR spectrum of compound **24b** (CDCl<sub>3</sub>, 125 MHz)

**15b**: 2-bromo-5-methyl-N-(1-oxo-1-(pyrrolidin-1-yl)propan-2-yl)-4-phenylthiophene-3-carboxamide

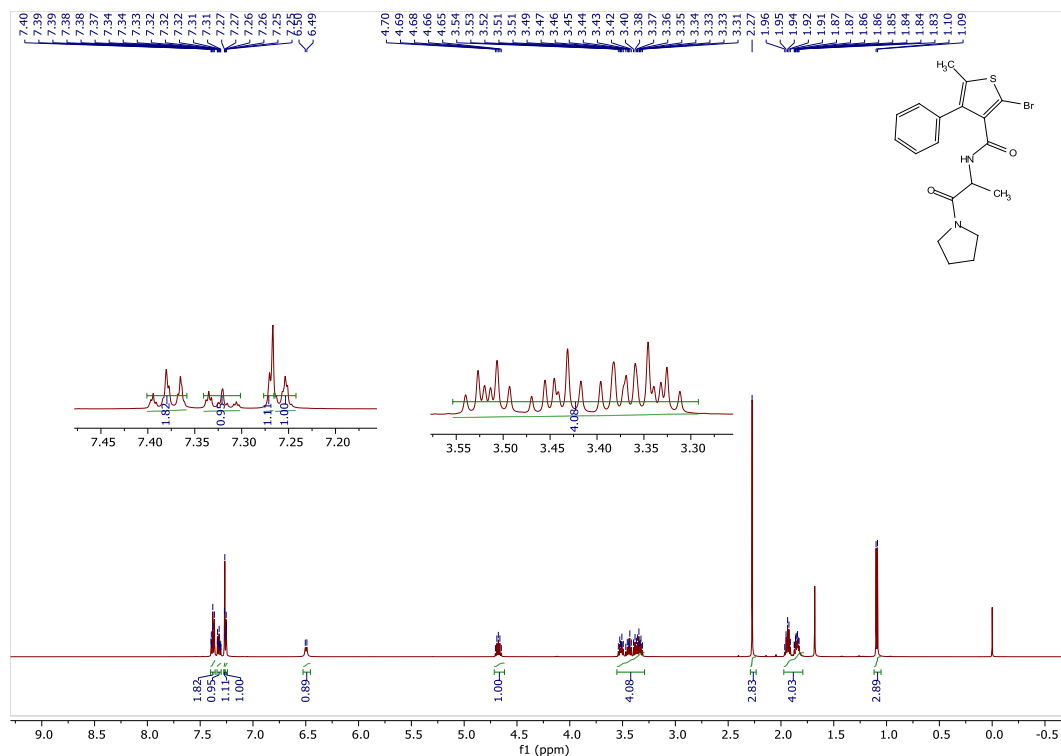

<sup>1</sup>H NMR spectrum of compound **15b** (CDCl<sub>3</sub>, 500 MHz)

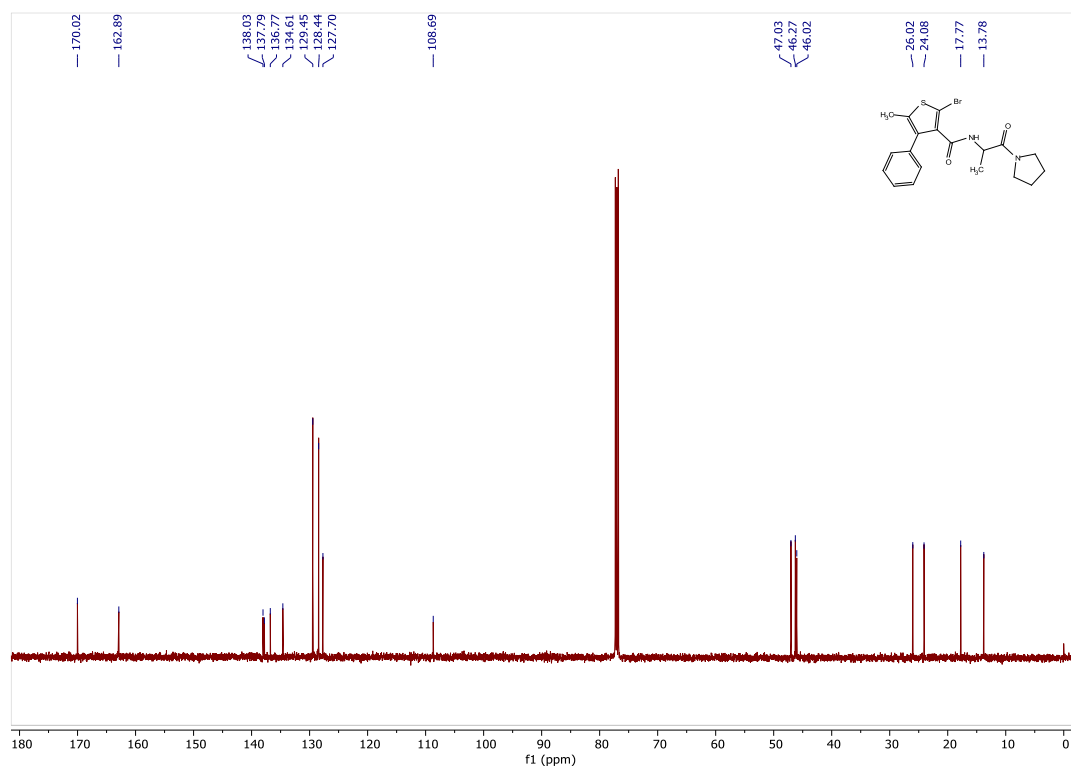

<sup>13</sup>C NMR spectrum of compound **15b** (CDCl<sub>3</sub>, 125 MHz)

**15e: 2-bromo-4-(3-bromophenyl)-N-(3-hydroxy-1-oxo-1-(pyrrolidin-1-yl)propan-2-yl)-5-methylthiophene-3-carboxamide**

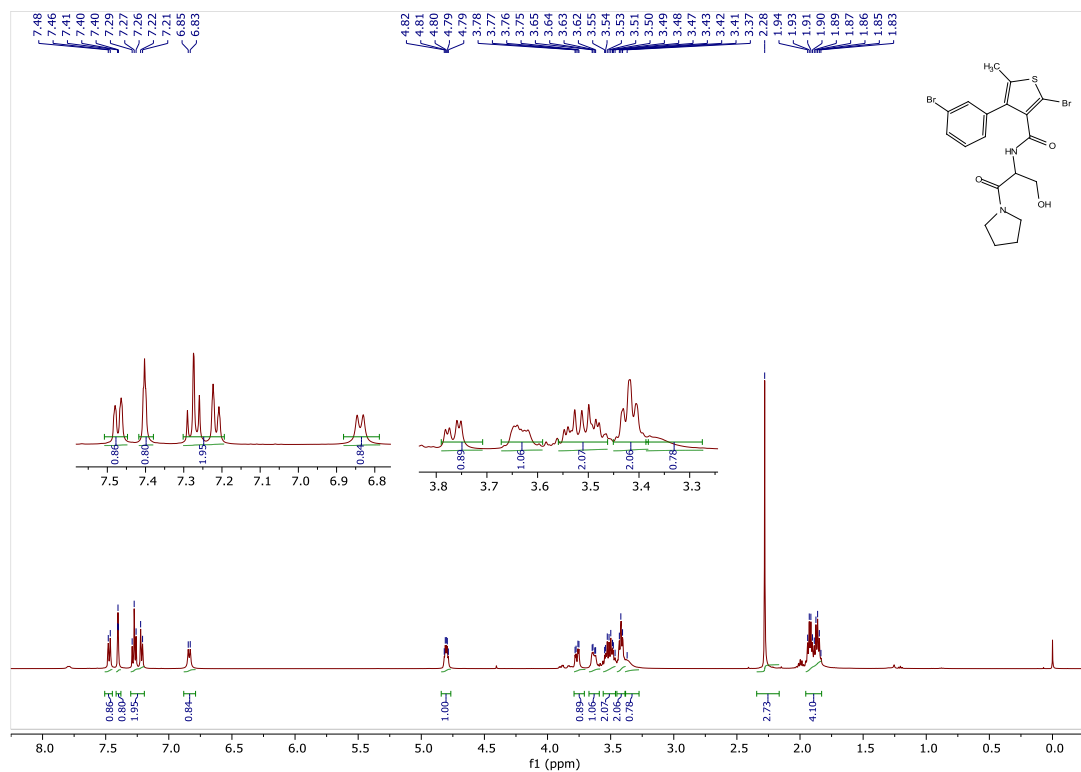

**<sup>1</sup>H NMR spectrum of compound 15e (CDCl<sub>3</sub>, 500 MHz)**

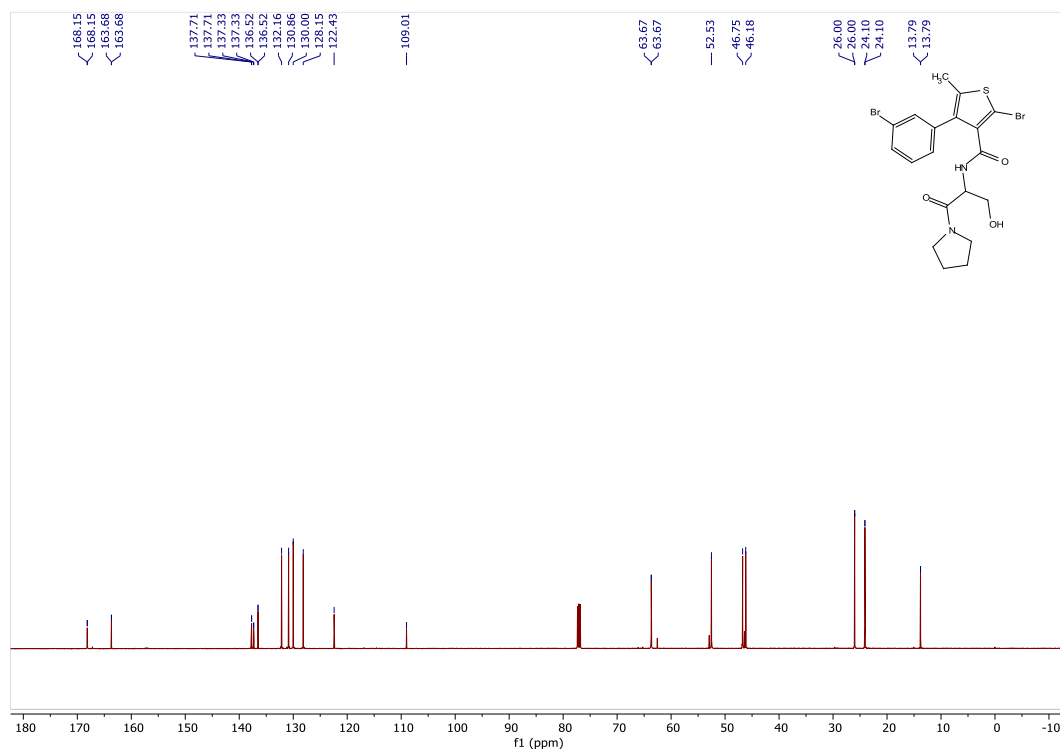

**<sup>13</sup>C NMR spectrum of compound 15e (CDCl<sub>3</sub>, 125 MHz)**





**15n**: 2-bromo-4-(3-fluorophenyl)-5-methyl-N-(2-oxo-2-(pyrrolidin-1-yl)ethyl)thiophene-3-carboxamide

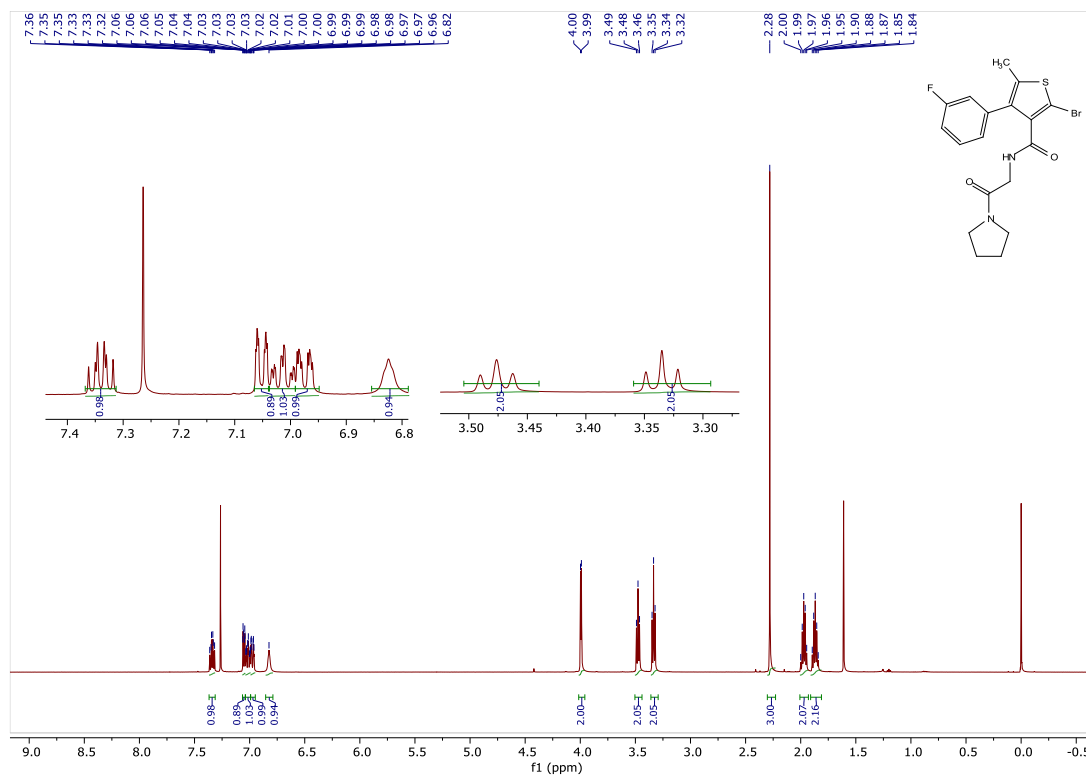

<sup>1</sup>H NMR spectrum of compound **15n** (CDCl<sub>3</sub>, 500 MHz)

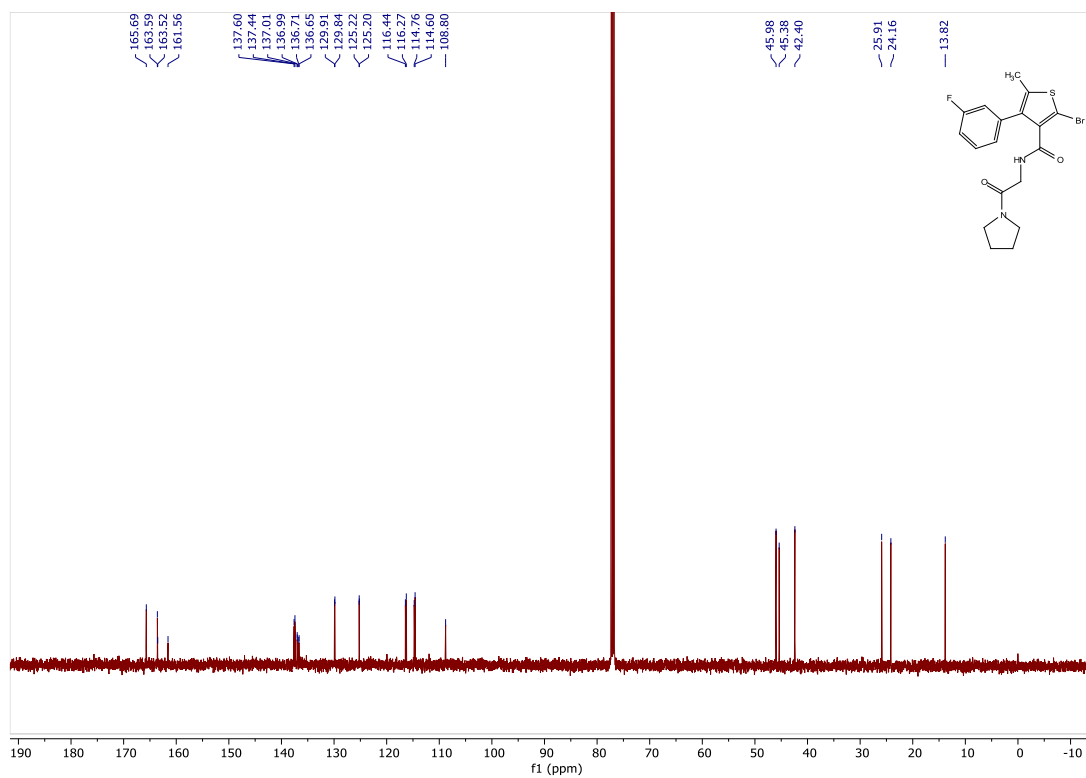

<sup>13</sup>C NMR spectrum of compound **15n** (CDCl<sub>3</sub>, 125 MHz)

**15o: 2-bromo-4-(3-fluorophenyl)-5-methyl-N-(1-oxo-1-(pyrrolidin-1-yl)propan-2-yl)thiophene-3-carboxamide**

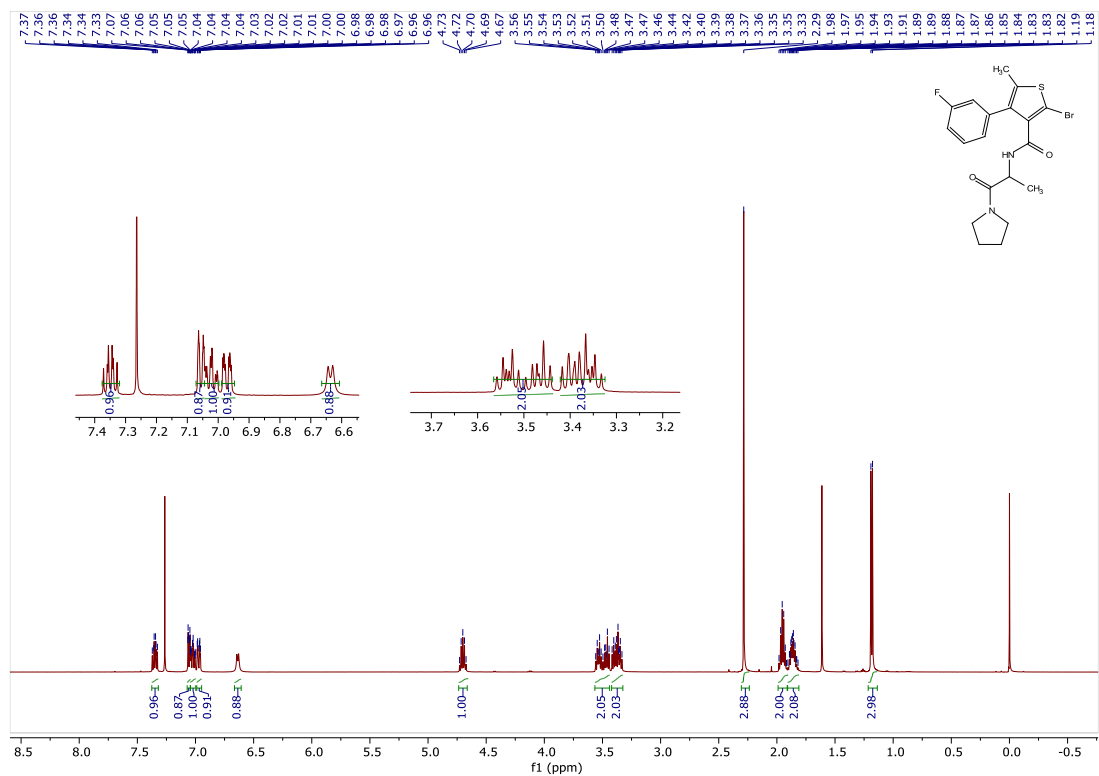

<sup>1</sup>H NMR spectrum of compound 15o (CDCl<sub>3</sub>, 500 MHz)

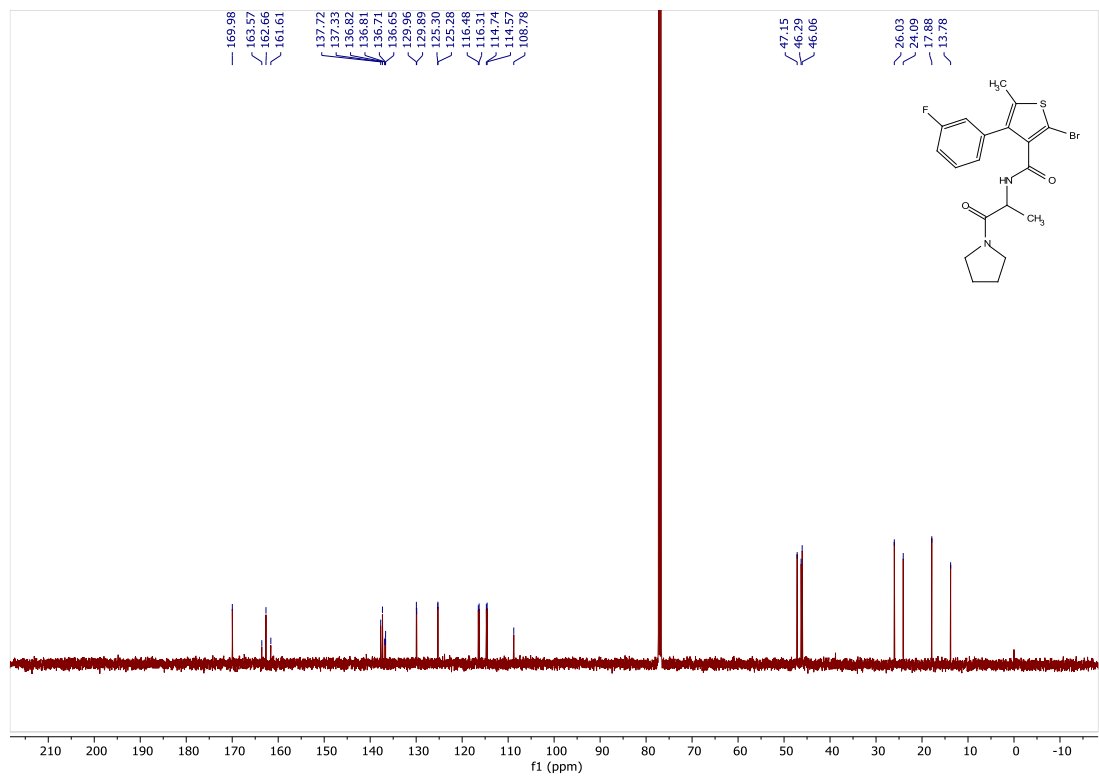

<sup>13</sup>C NMR spectrum of compound 15o (CDCl<sub>3</sub>, 125 MHz)

**16a**: 2,2'-selenobis(5-methyl-N-(2-oxo-2-(pyrrolidin-1-yl)ethyl)-4-phenylthiophene-3-carboxamide):

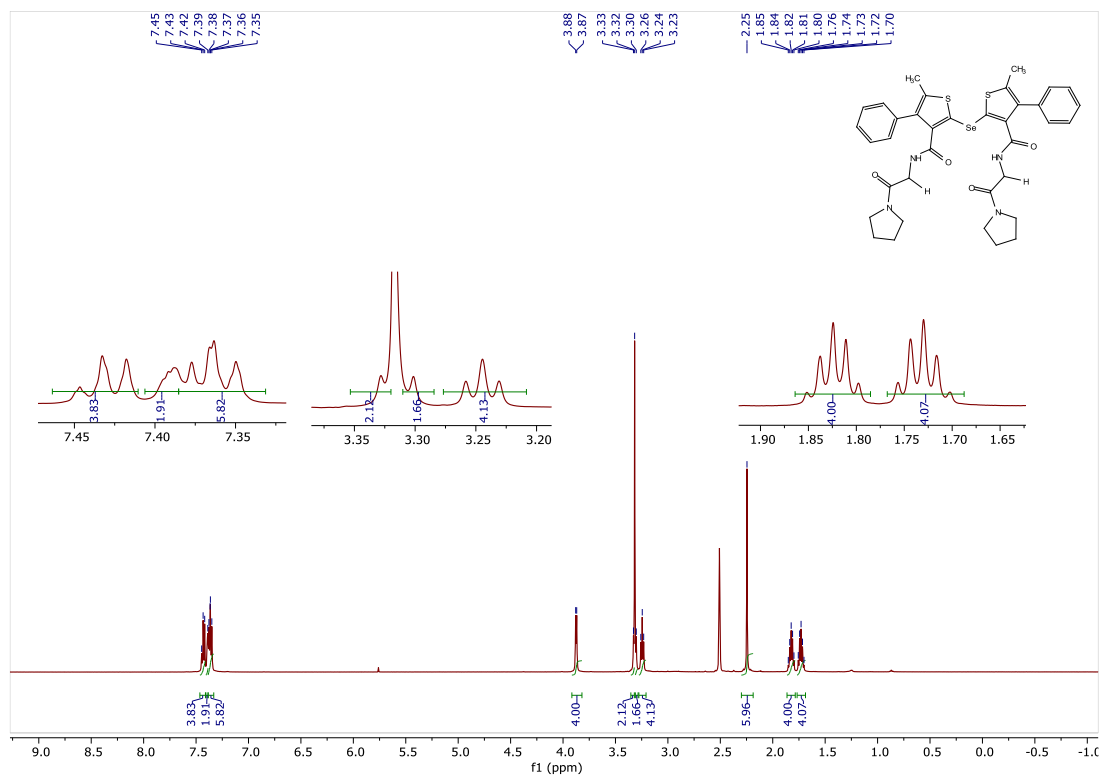

<sup>1</sup>H NMR spectrum of compound **16a** (DMSO-*d*<sub>6</sub>, 500 MHz)

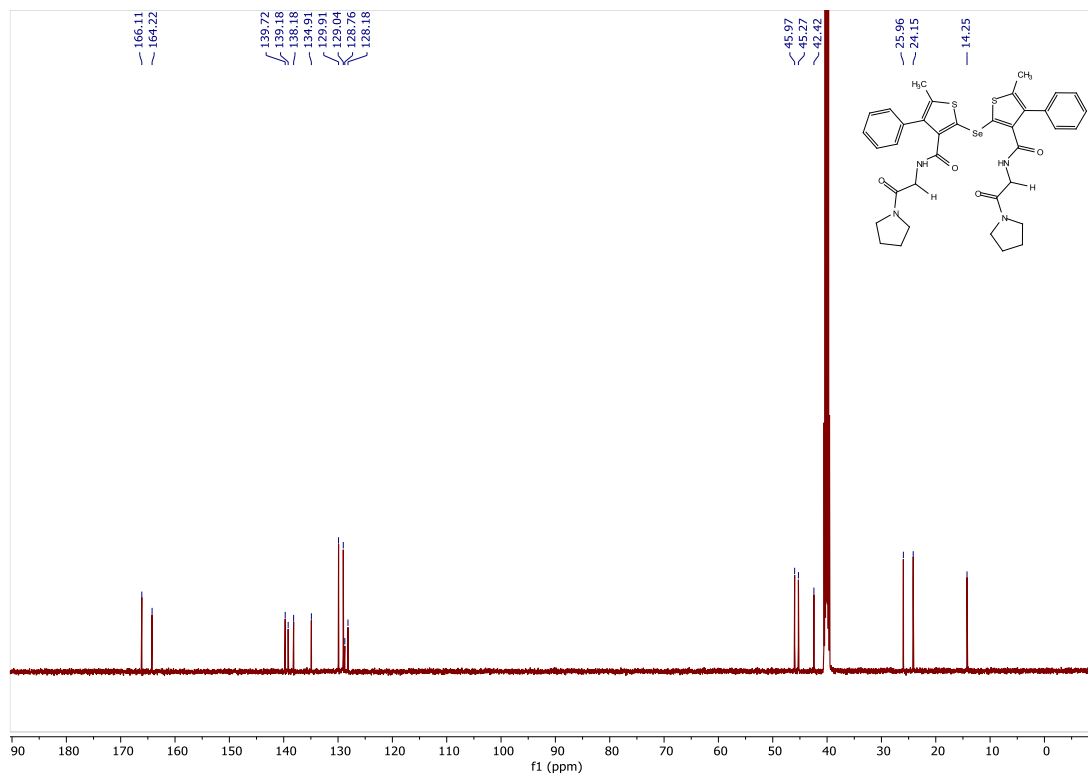

<sup>13</sup>C NMR spectrum of compound **16a** (DMSO-*d*<sub>6</sub>, 125 MHz)

**16b**: 2,2'-selenobis(5-methyl-N-(1-oxo-1-(pyrrolidin-1-yl)propan-2-yl)-4-phenylthiophene-3-carboxamide)

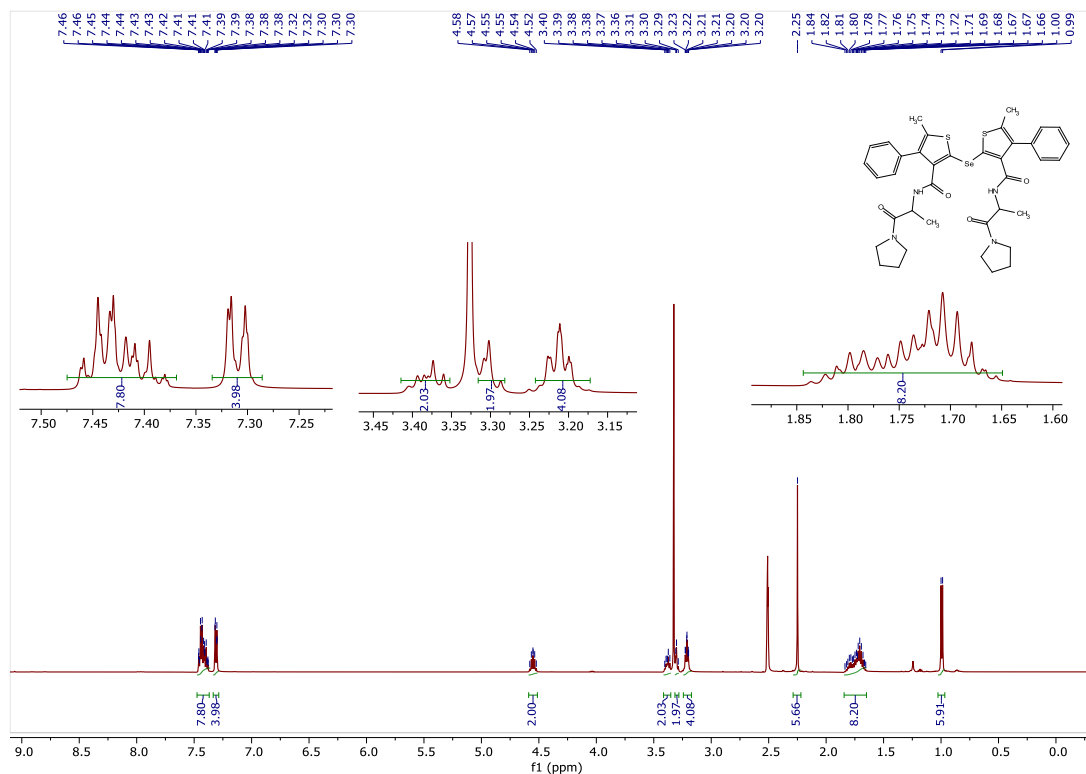

<sup>1</sup>H NMR spectrum of compound **16b** (DMSO-*d*<sub>6</sub>, 500 MHz)

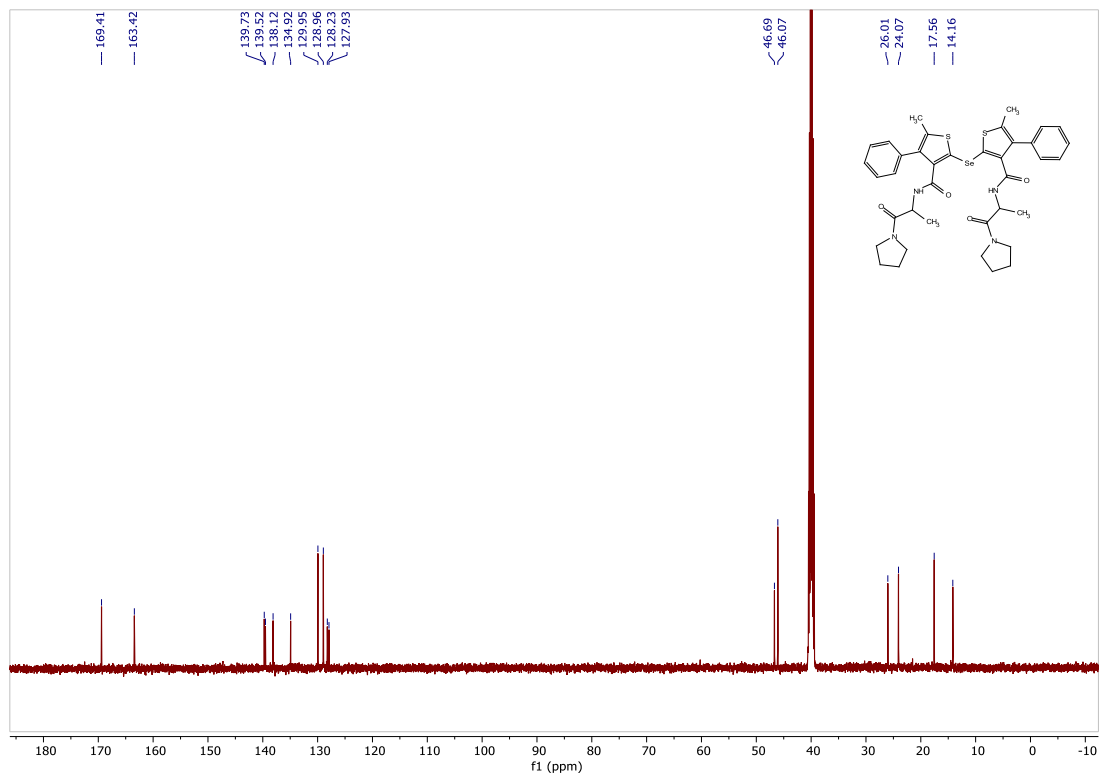

<sup>13</sup>C NMR spectrum of compound **16b** (DMSO-*d*<sub>6</sub>, 125 MHz)

**16c: 2,2'-selenobis(4-(3-bromophenyl)-5-methyl-N-(2-oxo-2-(pyrrolidin-1-yl)ethyl)thiophene-3-carboxamide)**

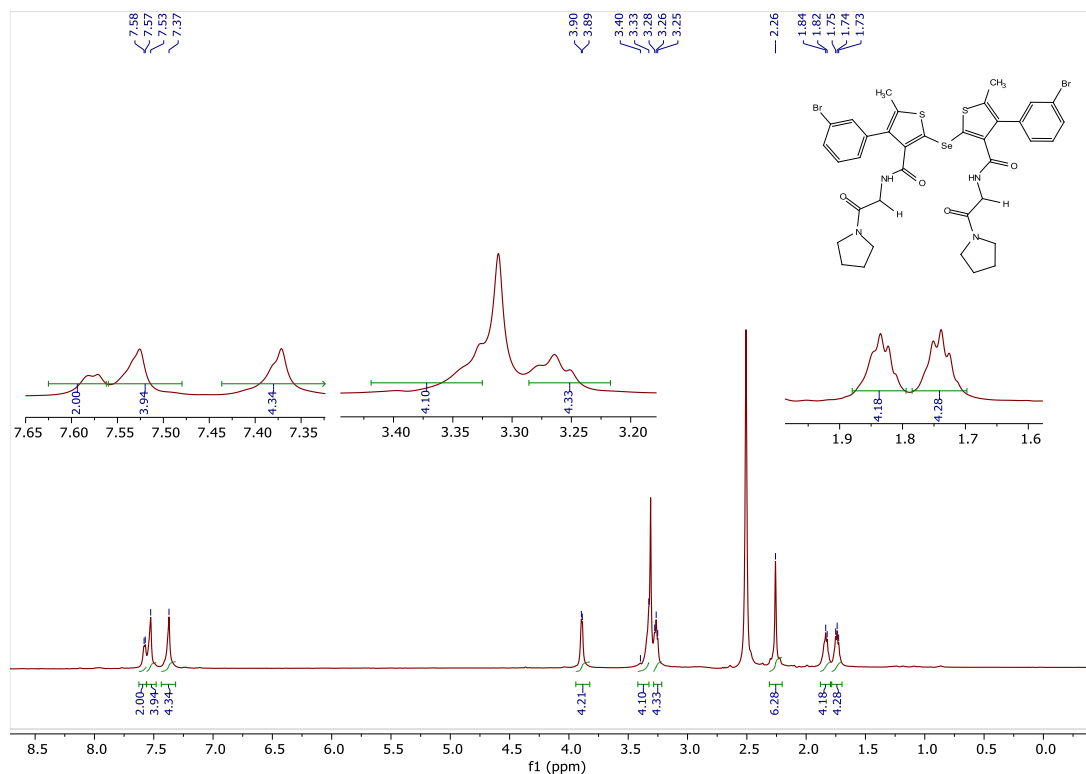

<sup>1</sup>H NMR spectrum of compound **16c** (DMSO-*d*<sub>6</sub>, 500 MHz)

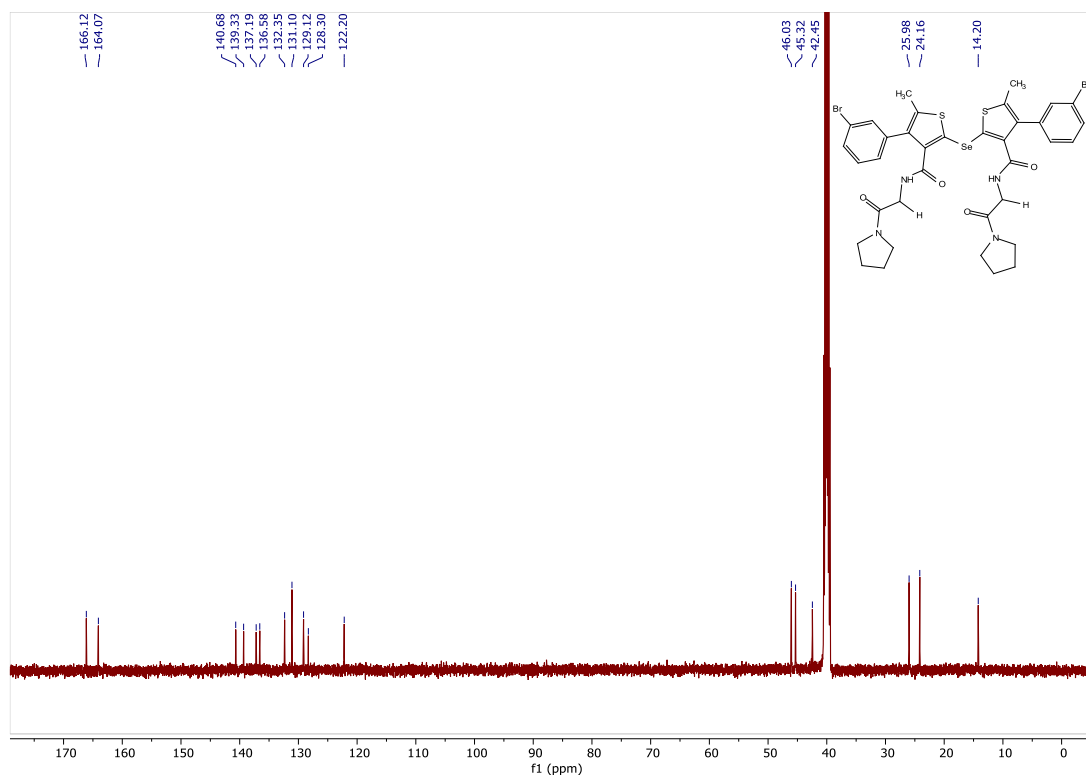

<sup>13</sup>C NMR spectrum of compound **16c** (DMSO-*d*<sub>6</sub>, 125 MHz)

**16d:** 2,2'-selenobis(4-(3-bromophenyl)-5-methyl-N-(1-oxo-1-(pyrrolidin-1-yl)propan-2-yl)thiophene-3-carboxamide)

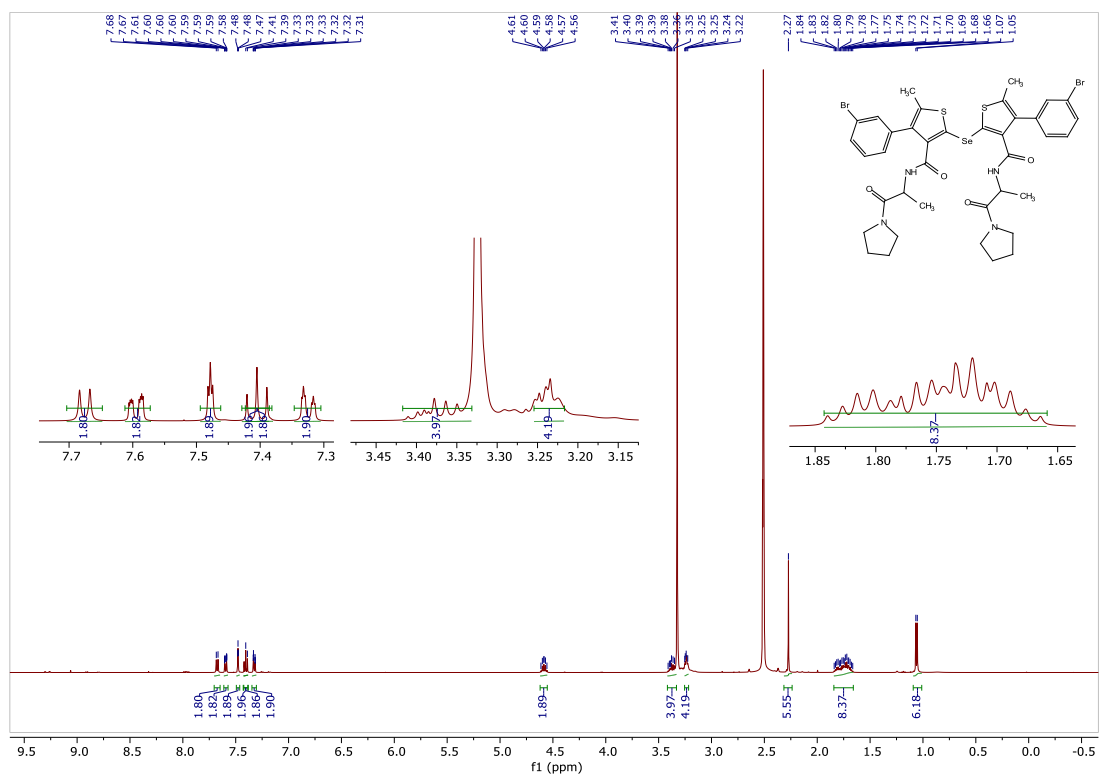

<sup>1</sup>H NMR spectrum of compound **16d** (DMSO-*d*<sub>6</sub>, 500 MHz)

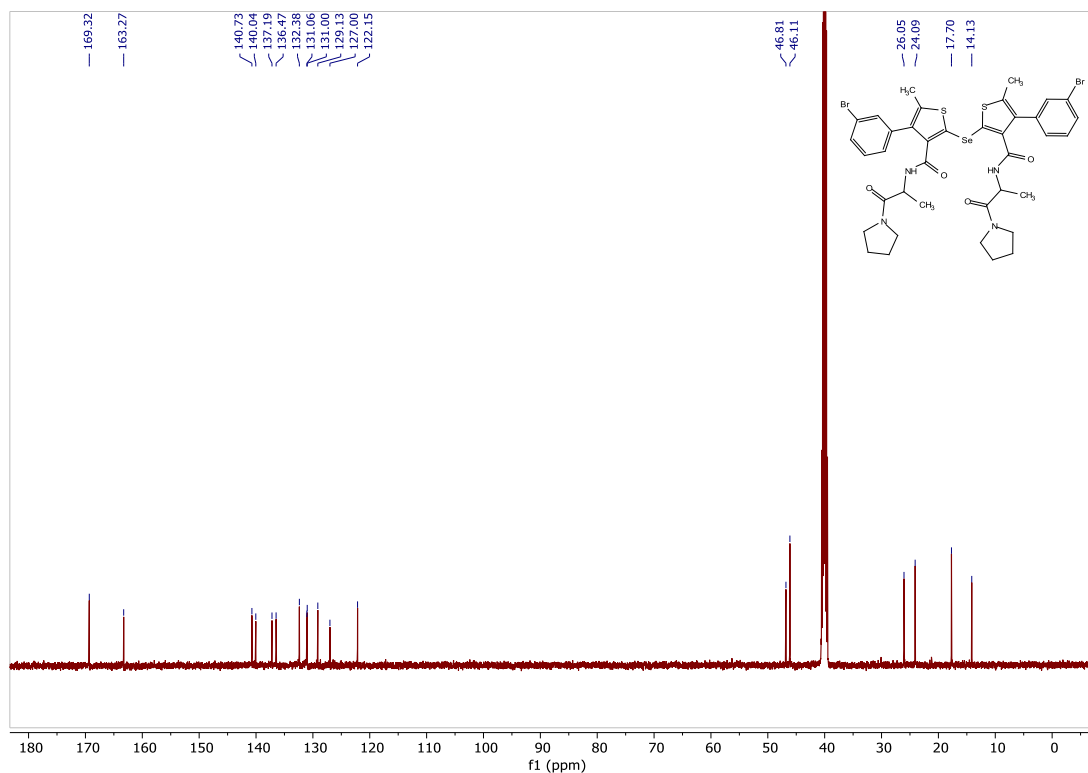

<sup>13</sup>C NMR spectrum of compound **16d** (DMSO-*d*<sub>6</sub>, 125 MHz)

**16e: 2,2'-selenobis(4-(3-bromophenyl)-N-(3-hydroxy-1-oxo-1-(pyrrolidin-1-yl)propan-2-yl)-5-methylthiophene-3-carboxamide)**

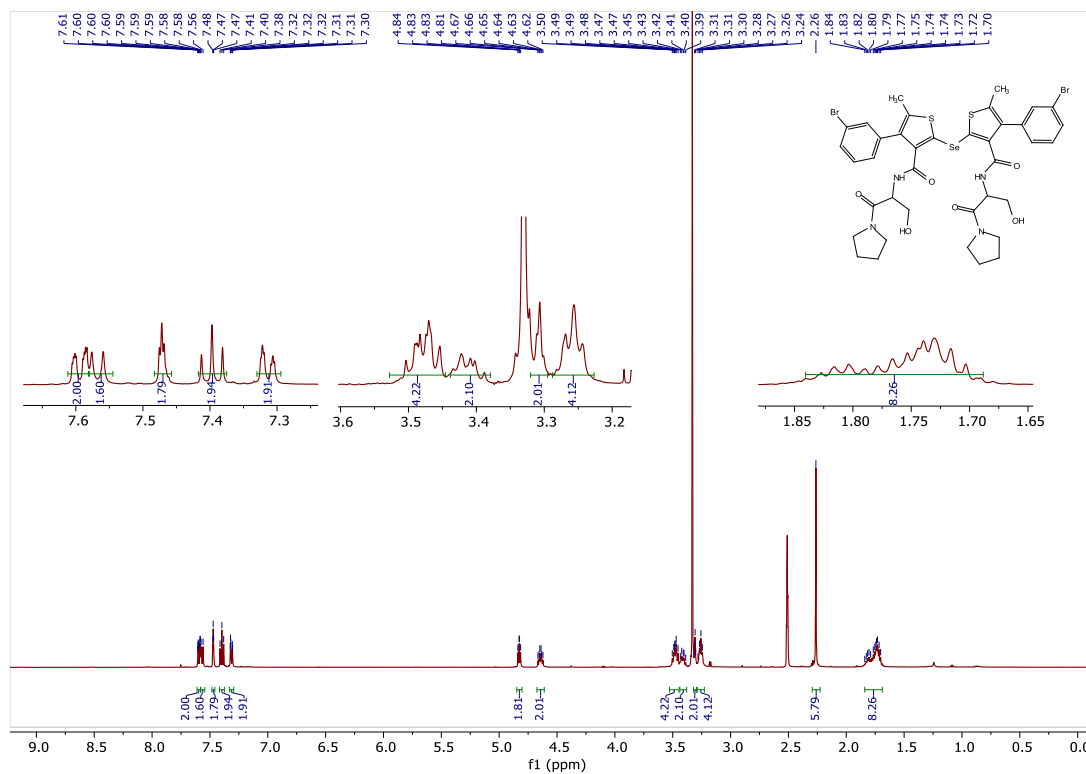

<sup>1</sup>H NMR spectrum of compound **16e** (DMSO-*d*<sub>6</sub>, 500 MHz)

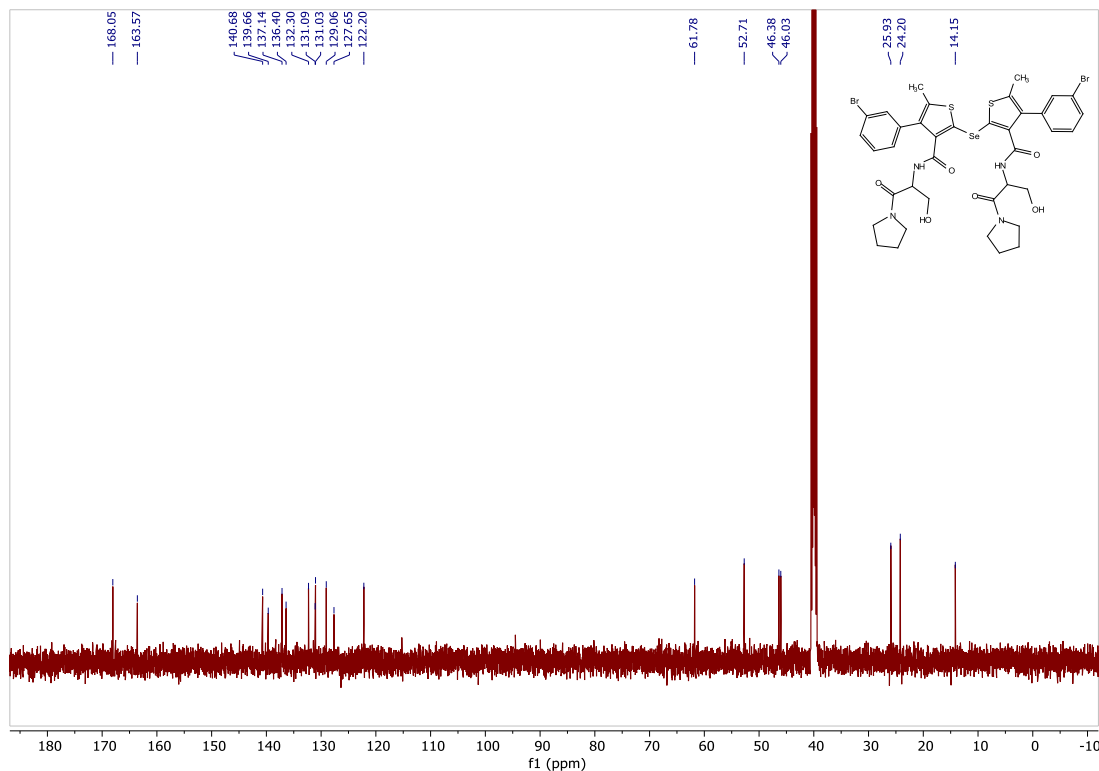

<sup>13</sup>C NMR spectrum of compound **16e** (DMSO-*d*<sub>6</sub>, 125 MHz)

**16f**: 2,2'-selenobis(4-(3-bromophenyl)-5-methyl-N-(3-methyl-1-oxo-1-(pyrrolidin-1-yl)butan-2-yl)thiophene-3-carboxamide)

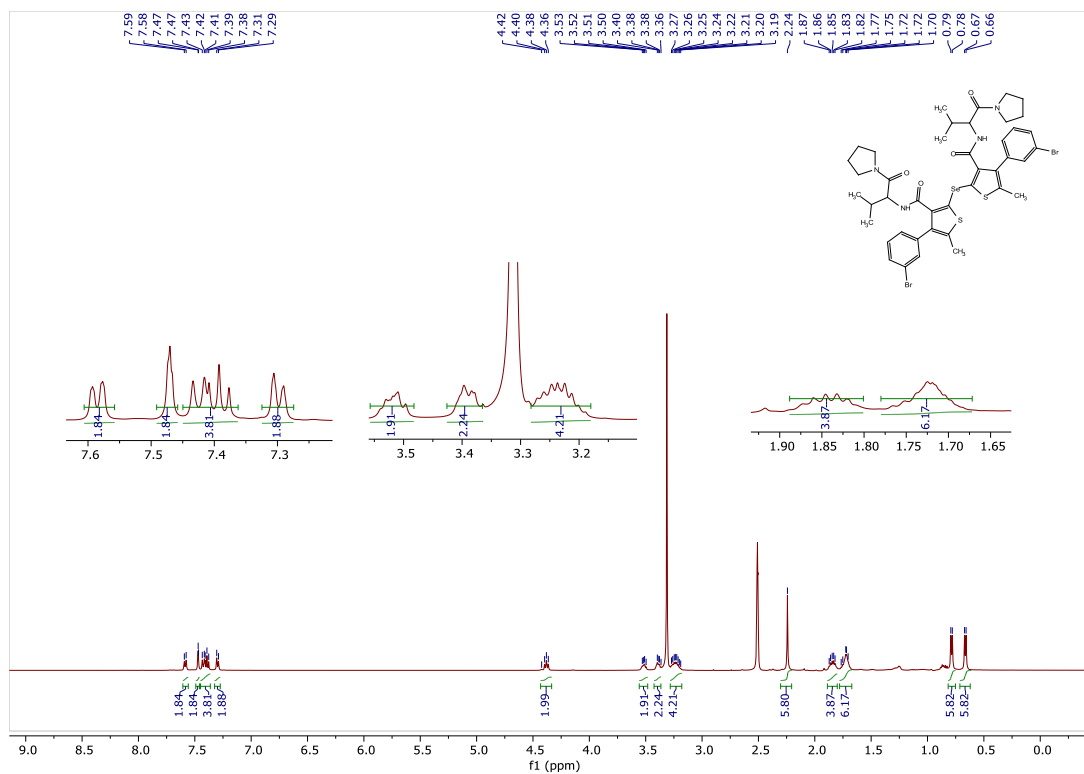

<sup>1</sup>H NMR spectrum of compound **16f** (DMSO-*d*<sub>6</sub>, 500 MHz)

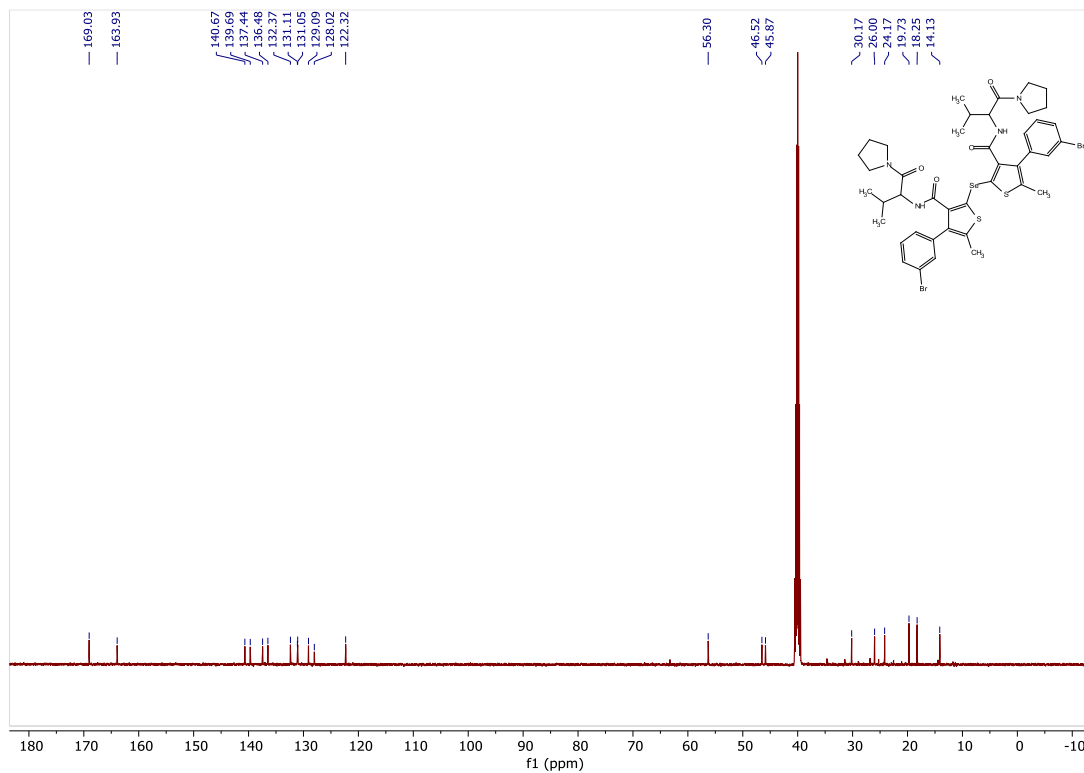

<sup>13</sup>C NMR spectrum of compound **16f** (DMSO-*d*<sub>6</sub>, 125 MHz)



**16g**: 2,2'-selenobis(4-(3-bromophenyl)-5-methyl-N-(3-methyl-1-oxo-1-(pyrrolidin-1-yl)butan-2-yl)thiophene-3-carboxamide)

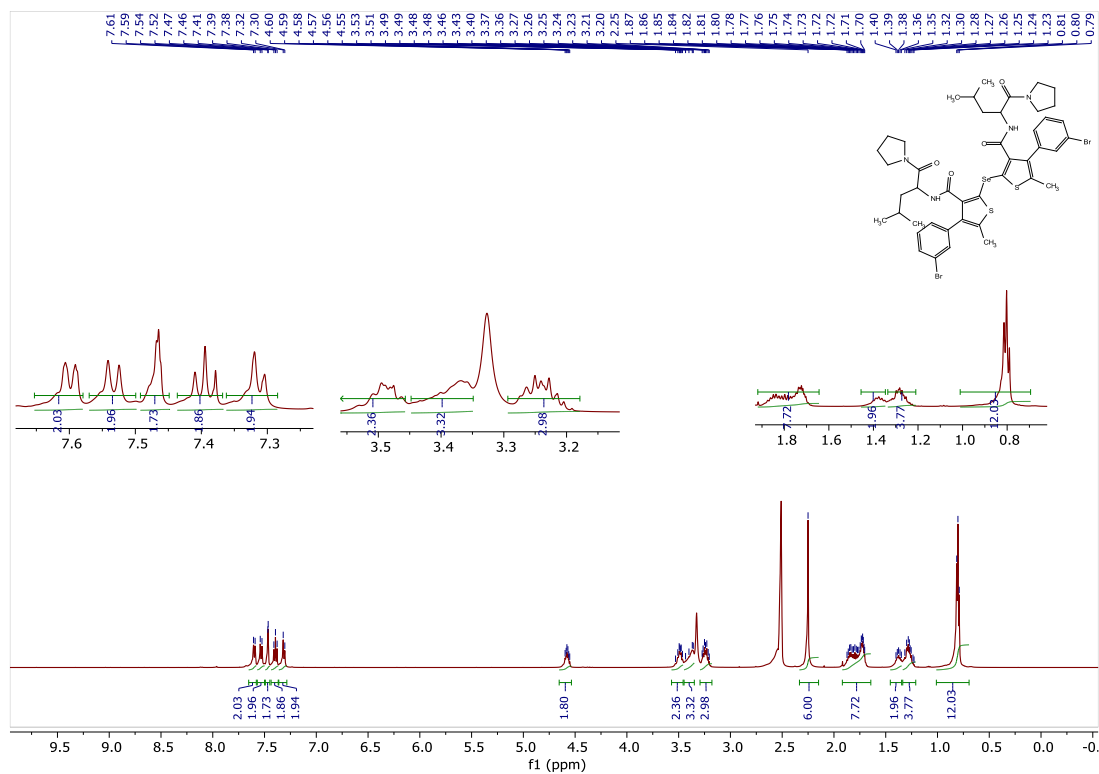

<sup>1</sup>H NMR spectrum of compound **16g** (DMSO-*d*<sub>6</sub>, 500 MHz)

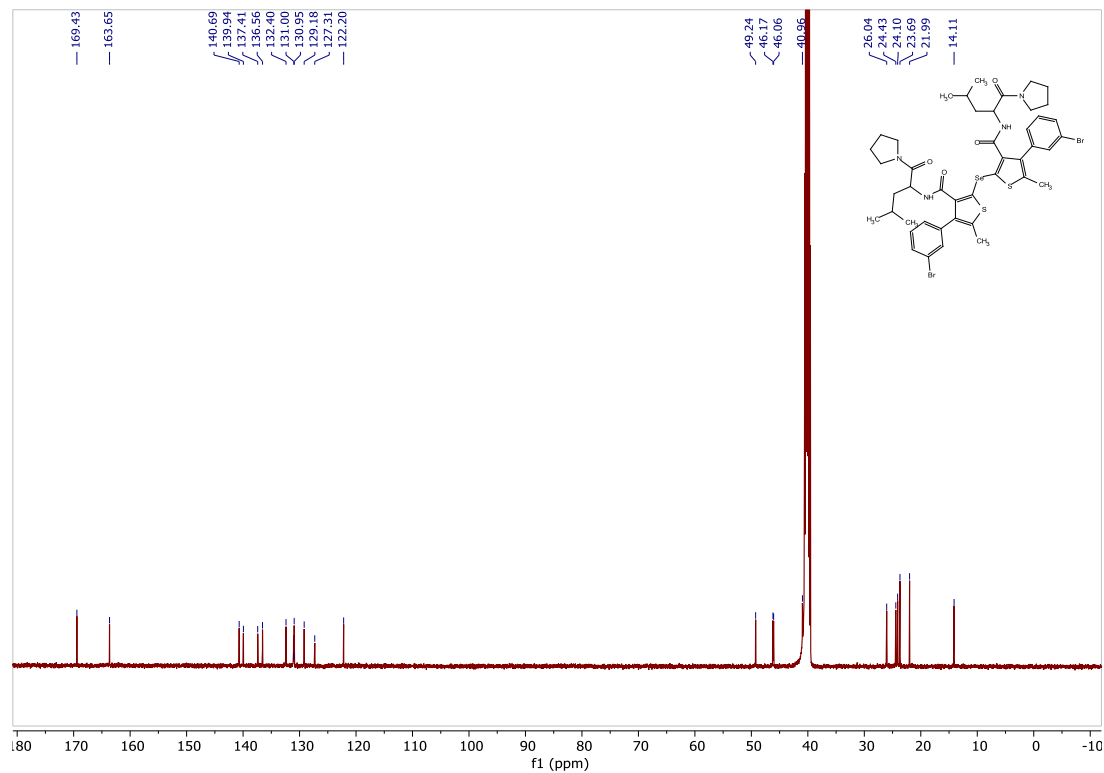

<sup>13</sup>C NMR spectrum of compound **16g** (DMSO-*d*<sub>6</sub>, 125 MHz)

**16h**: 2,2'-selenobis(4-(3-bromophenyl)-5-methyl-N-(1-oxo-3-phenyl-1-(pyrrolidin-1-yl)propan-2-yl)thiophene-3-carboxamide)

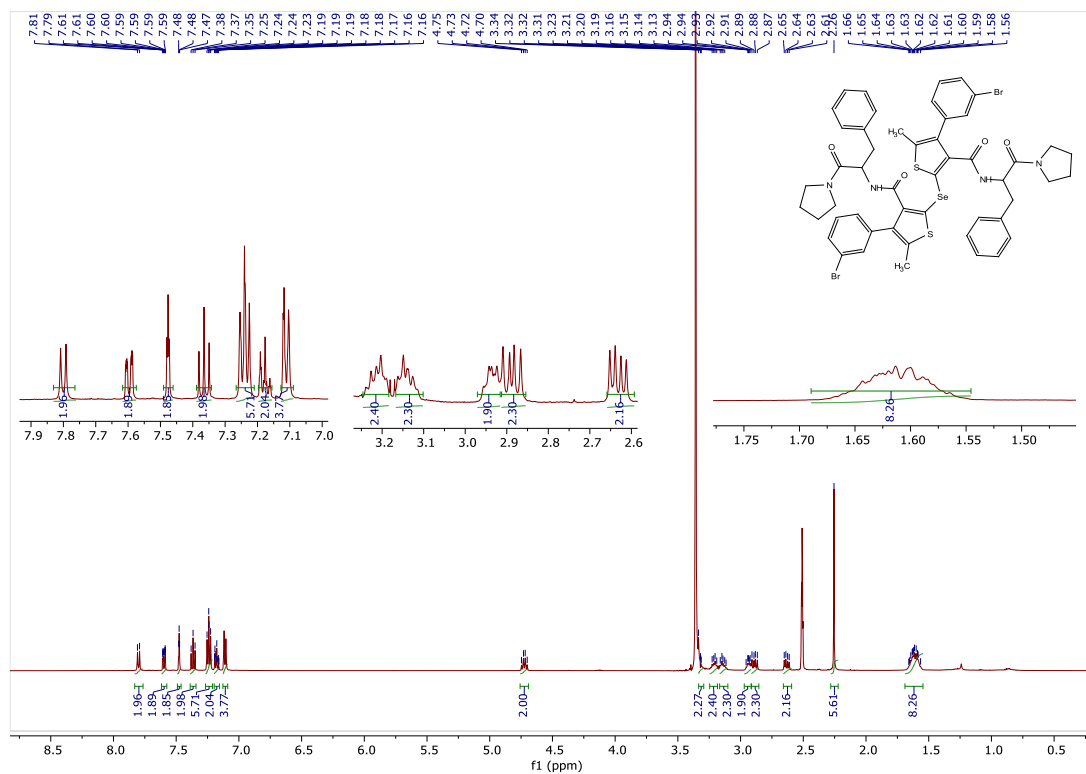

<sup>1</sup>H NMR spectrum of compound **16h** (DMSO-*d*<sub>6</sub>, 500 MHz)

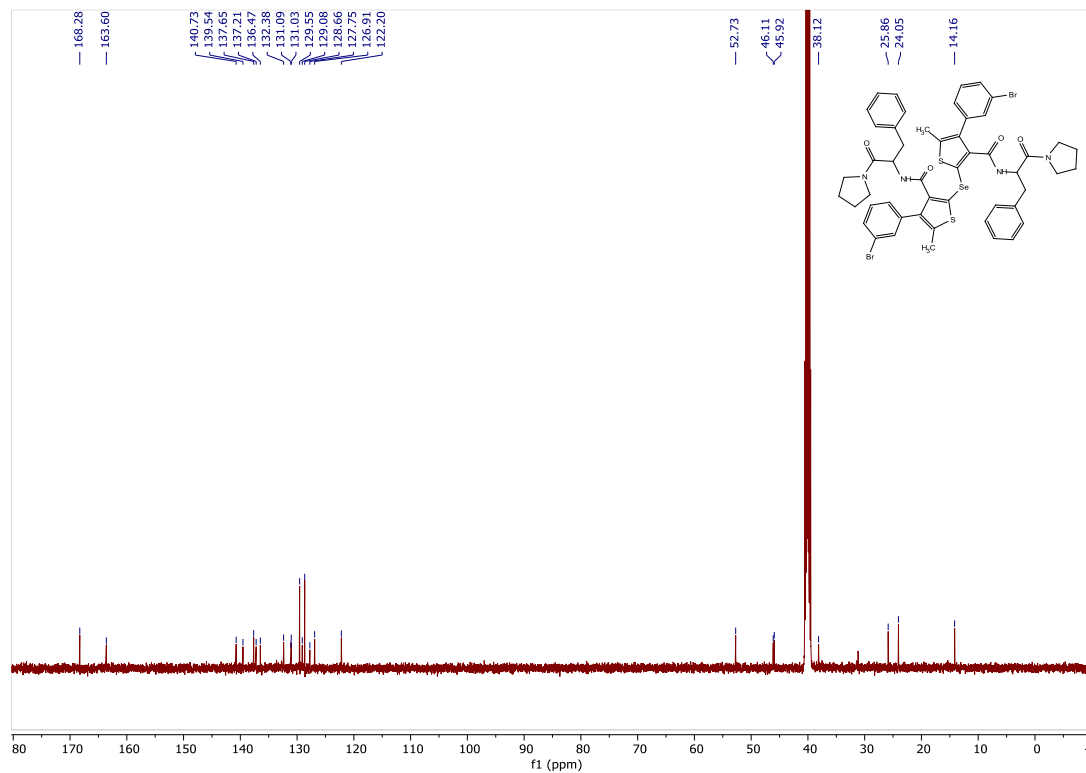

<sup>13</sup>C NMR spectrum of compound **16h** (DMSO-*d*<sub>6</sub>, 125 MHz)

**16i: 2,2'-selenobis(4-(3-chlorophenyl)-5-methyl-N-(1-oxo-1-(pyrrolidin-1-yl)propan-2-yl)thiophene-3-carboxamide)**

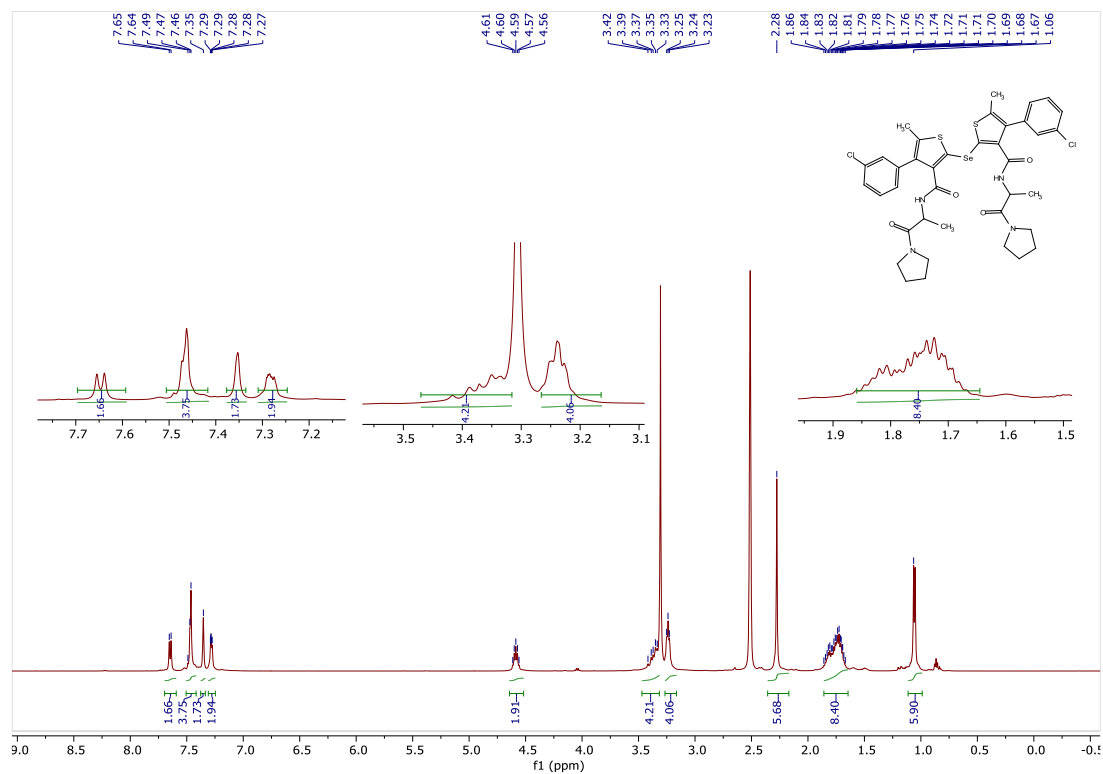

<sup>1</sup>H NMR spectrum of compound **16i** (DMSO-*d*<sub>6</sub>, 500 MHz)

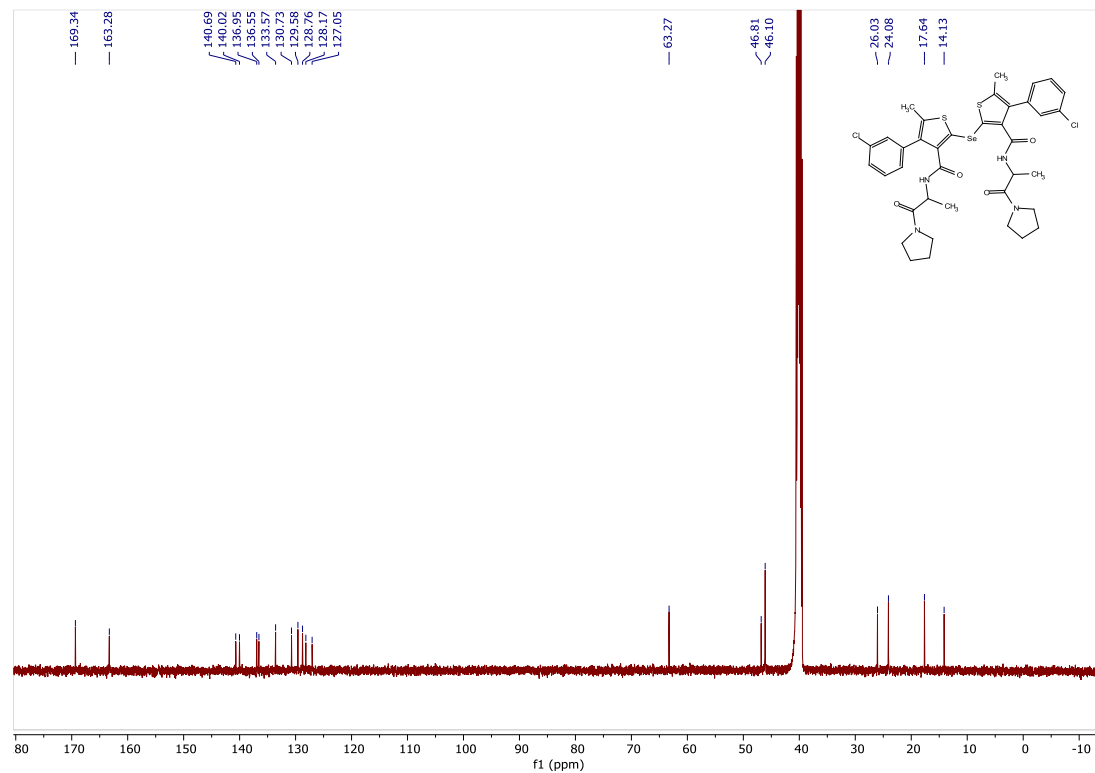

<sup>13</sup>C NMR spectrum of compound **16i** (DMSO-*d*<sub>6</sub>, 125 MHz)

**16j**: 2,2'-selenobis(4-(3-chlorophenyl)-N-(3-hydroxy-1-oxo-1-(pyrrolidin-1-yl)propan-2-yl)-5-methylthiophene-3-carboxamide)

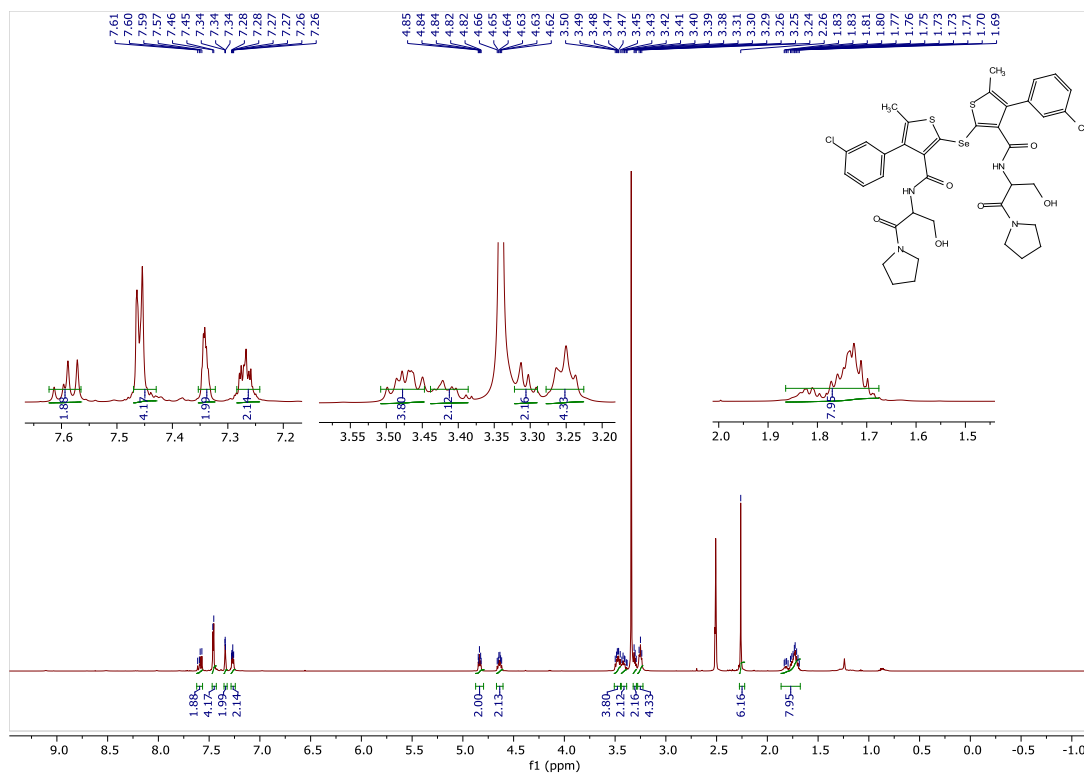

<sup>1</sup>H NMR spectrum of compound **16j** (DMSO-*d*<sub>6</sub>, 500 MHz)

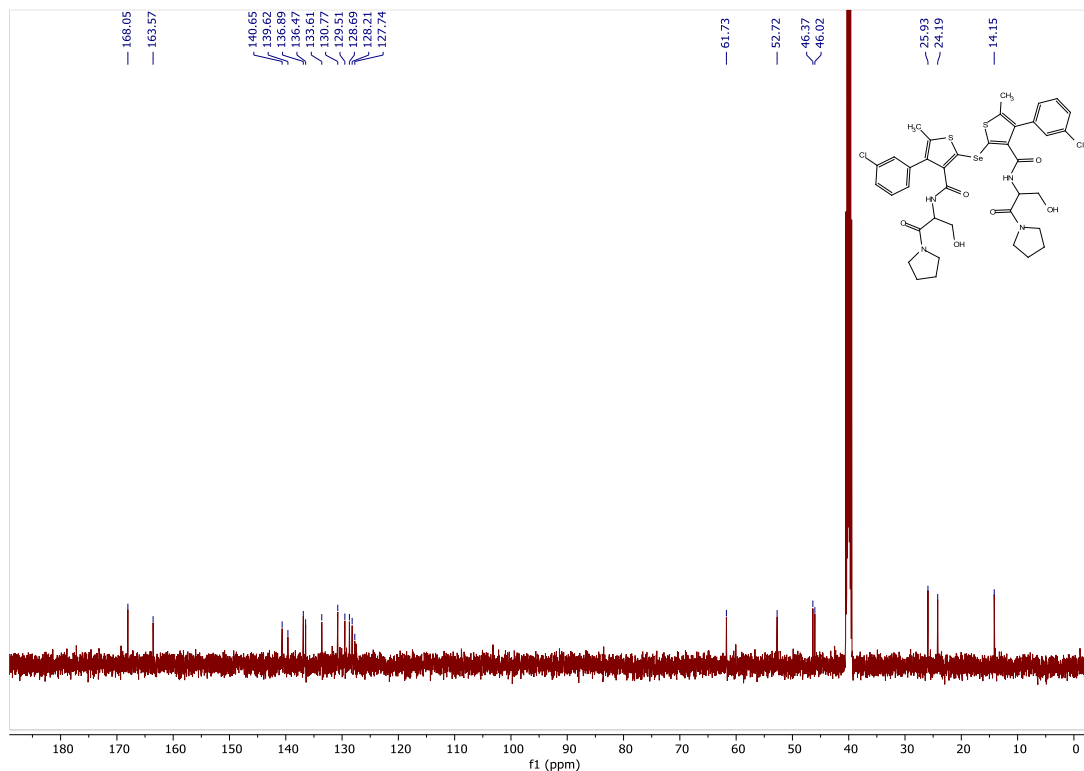

<sup>13</sup>C NMR spectrum of compound **16j** (DMSO-*d*<sub>6</sub>, 125 MHz)

**16k**: 2,2'-selenobis(4-(3-chlorophenyl)-5-methyl-N-(3-methyl-1-oxo-1-(pyrrolidin-1-yl)butan-2-yl)thiophene-3-carboxamide)

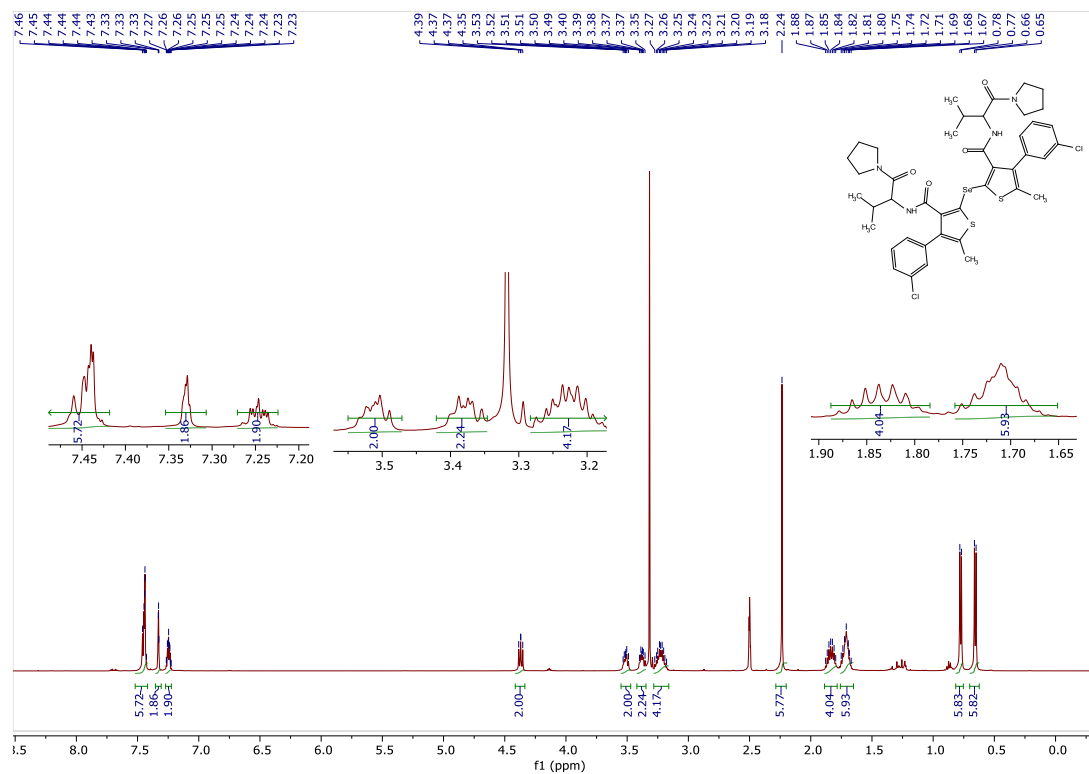

<sup>1</sup>H NMR spectrum of compound **16k** (DMSO-*d*<sub>6</sub>, 500 MHz)

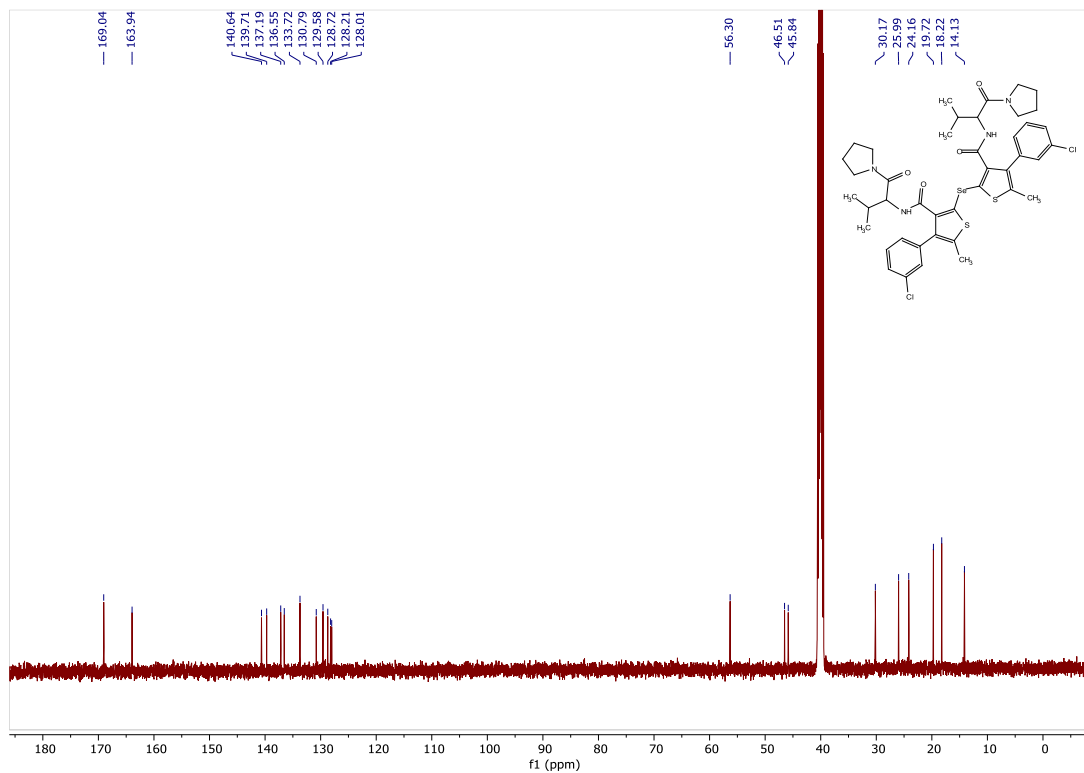

<sup>13</sup>C NMR spectrum of compound **16k** (DMSO-*d*<sub>6</sub>, 125 MHz)

**16l**: 2,2'-selenobis(4-(3-chlorophenyl)-5-methyl-N-(4-methyl-1-oxo-1-(pyrrolidin-1-yl)pentan-2-yl)thiophene-3-carboxamide)

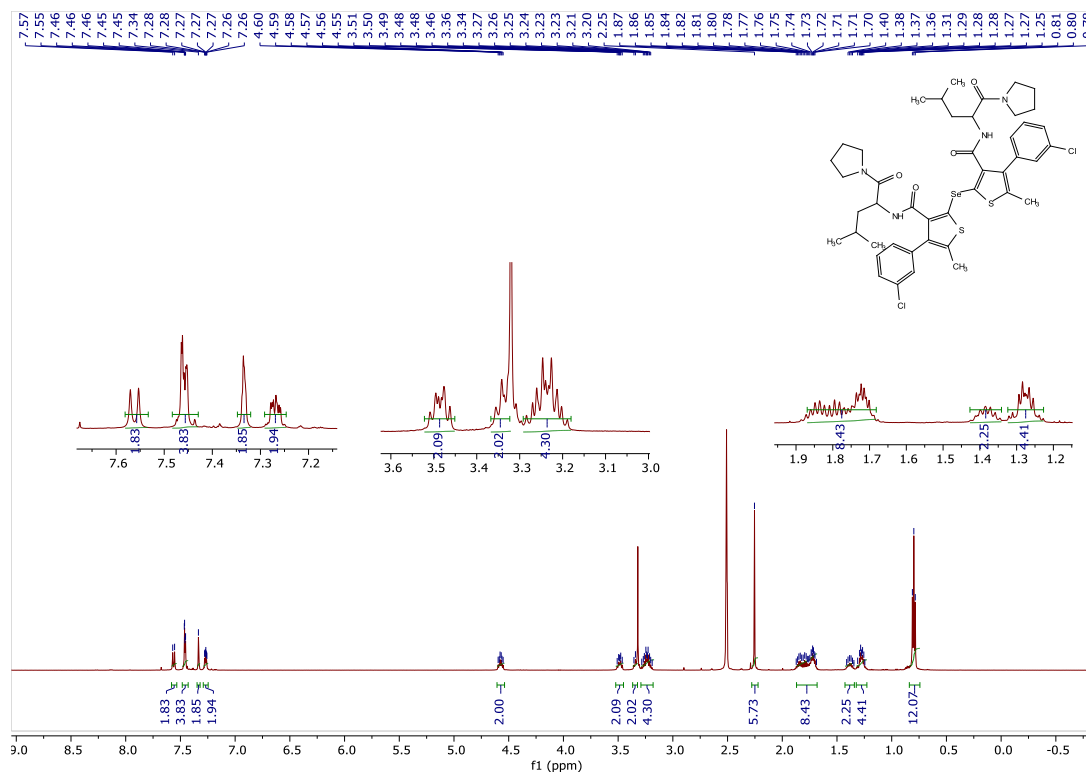

<sup>1</sup>H NMR spectrum of compound **16l** (DMSO-*d*<sub>6</sub>, 500 MHz)

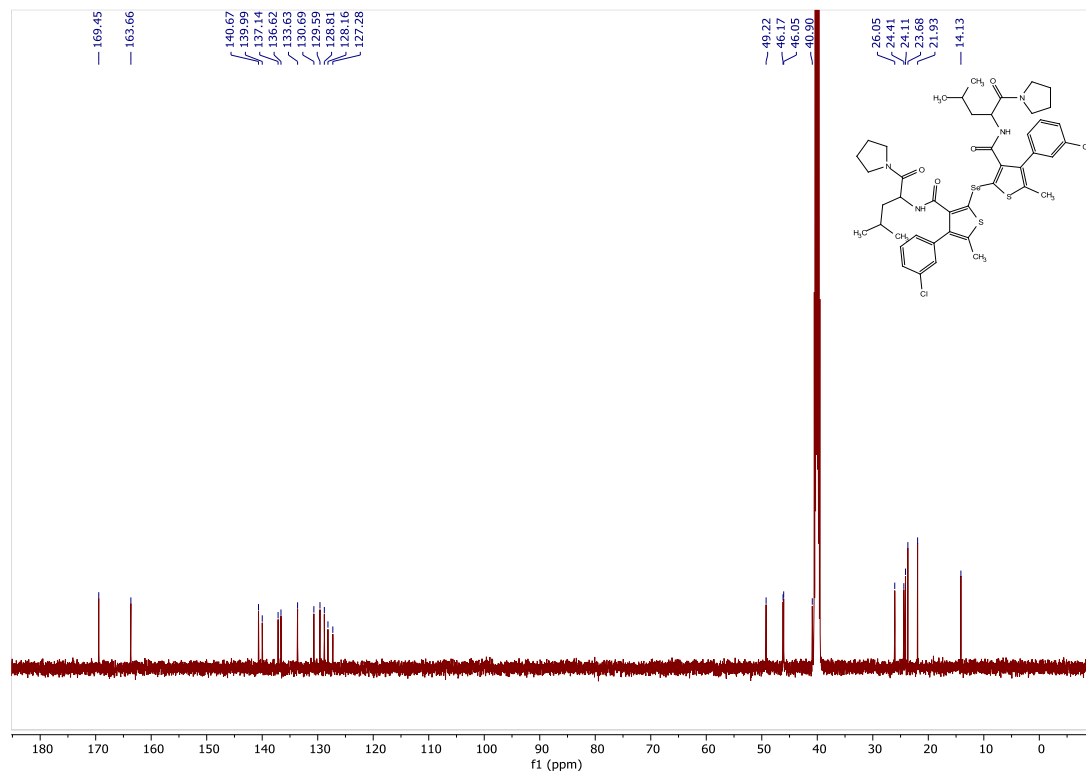

<sup>13</sup>C NMR spectrum of compound **16k** (DMSO-*d*<sub>6</sub>, 125 MHz)

**16m:** 2,2'-selenobis(4-(3-chlorophenyl)-5-methyl-N-(1-oxo-3-phenyl-1-(pyrrolidin-1-yl)propan-2-yl)thiophene-3-carboxamide)

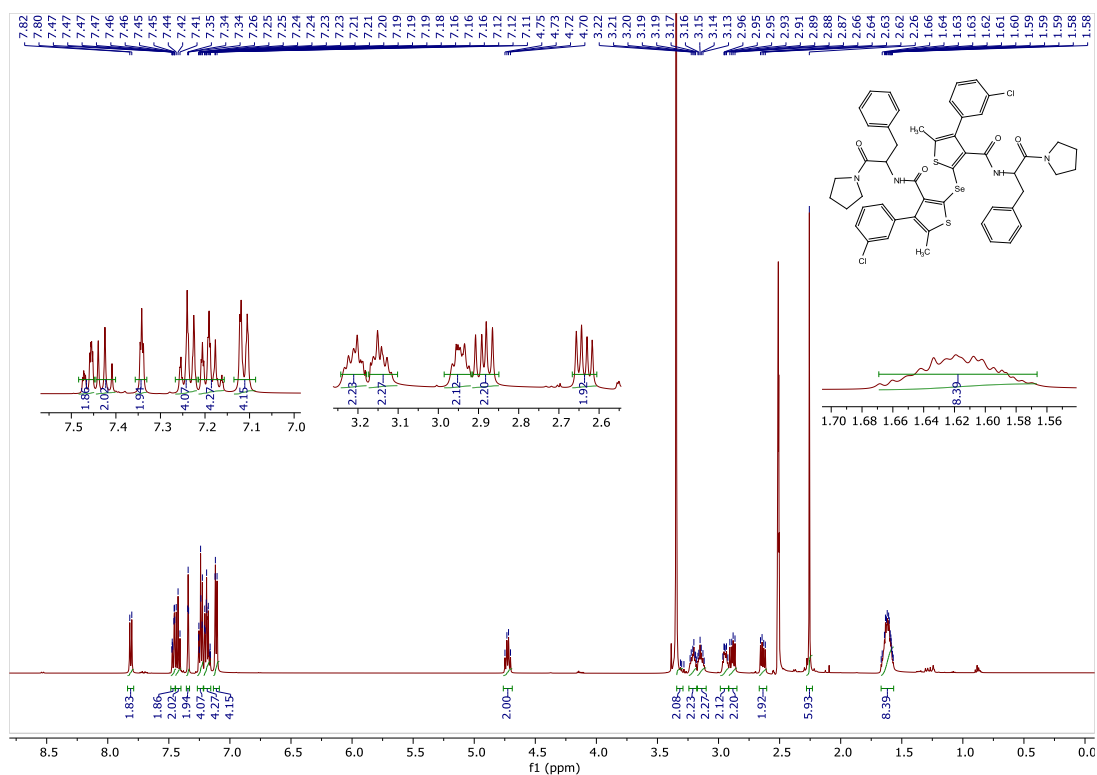

<sup>1</sup>H NMR spectrum of compound **16m** (DMSO-*d*<sub>6</sub>, 500 MHz)

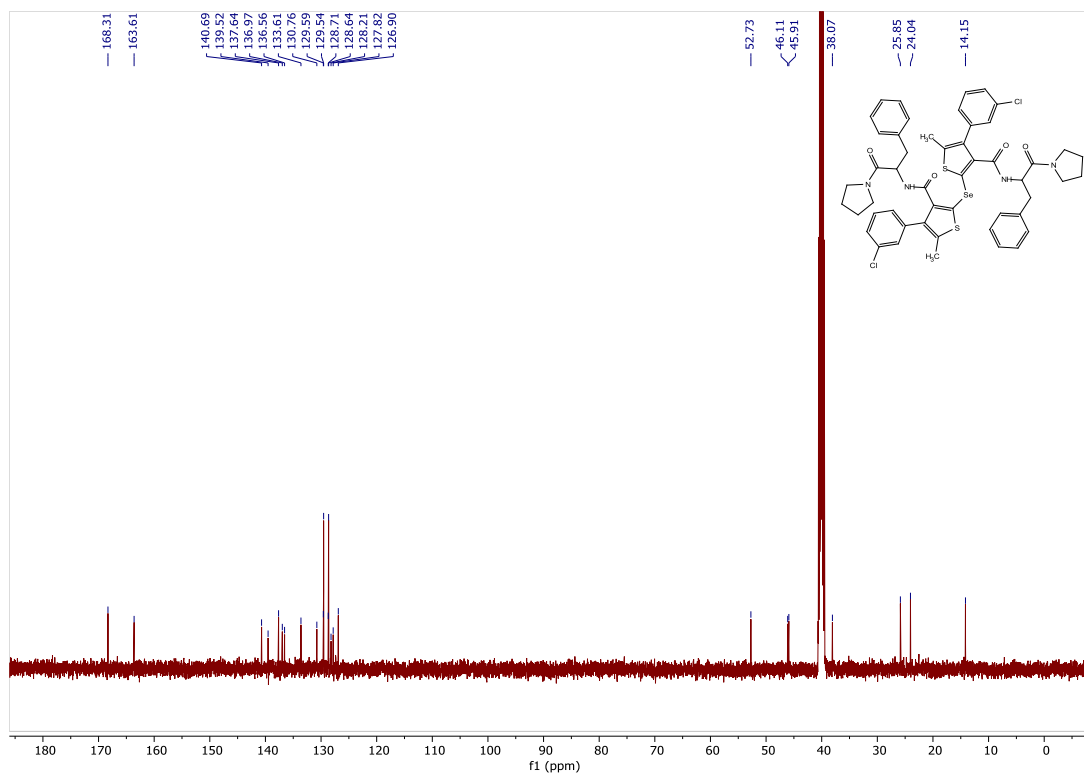

<sup>13</sup>C NMR spectrum of compound **16m** (DMSO-*d*<sub>6</sub>, 125 MHz)

**16n**: 2,2'-selenobis(4-(3-fluorophenyl)-5-methyl-N-(2-oxo-2-(pyrrolidin-1-yl)ethyl)thiophene-3-carboxamide)

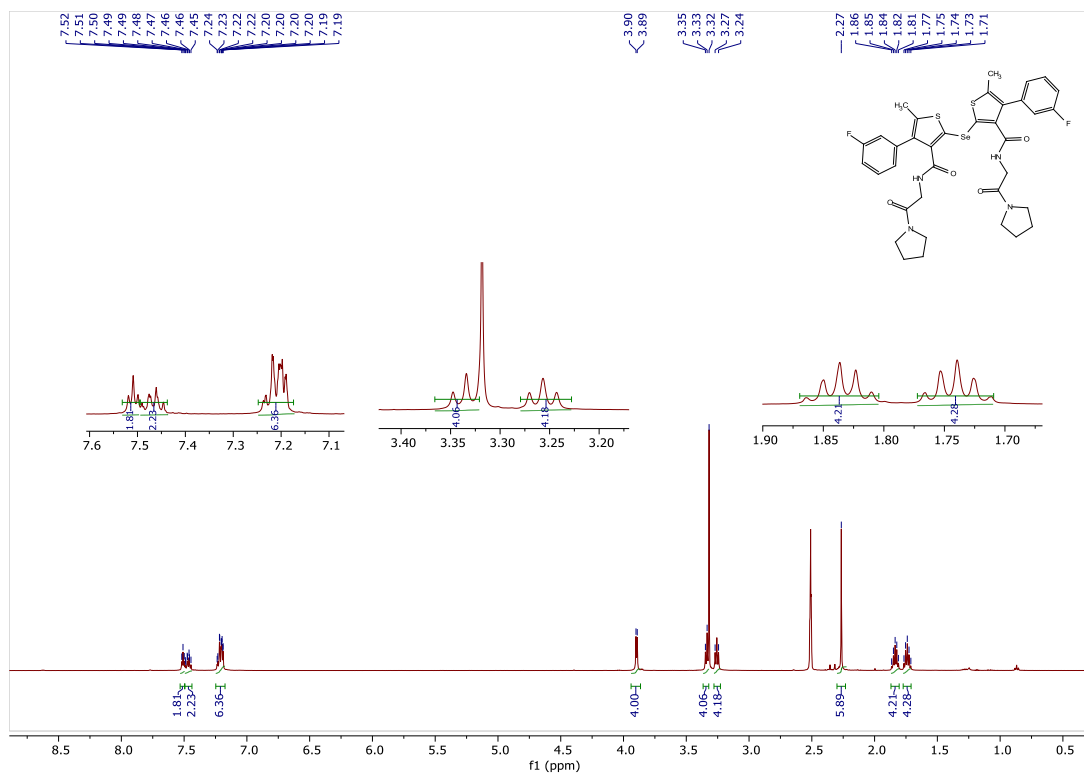

<sup>1</sup>H NMR spectrum of compound **16n** (DMSO-*d*<sub>6</sub>, 500 MHz)

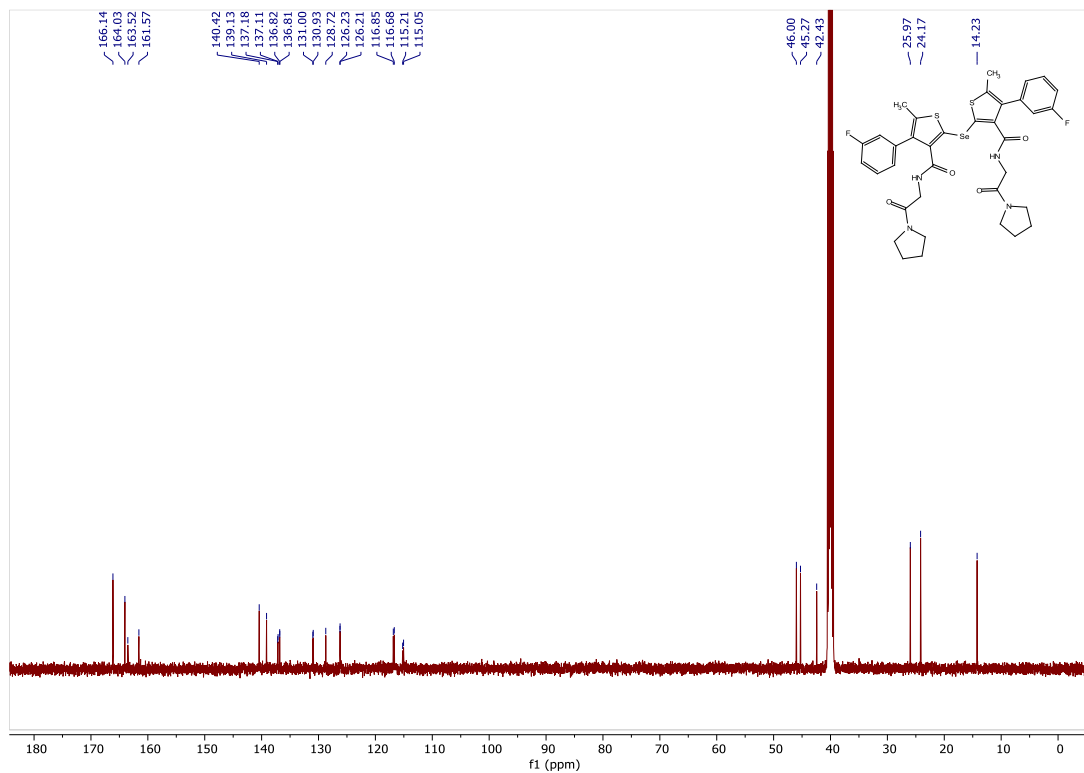

<sup>13</sup>C NMR spectrum of compound **16n** (DMSO-*d*<sub>6</sub>, 125 MHz)



**16o**: 2,2'-selenobis(4-(3-fluorophenyl)-5-methyl-N-(1-oxo-1-(pyrrolidin-1-yl)propan-2-yl)thiophene-3-carboxamide)

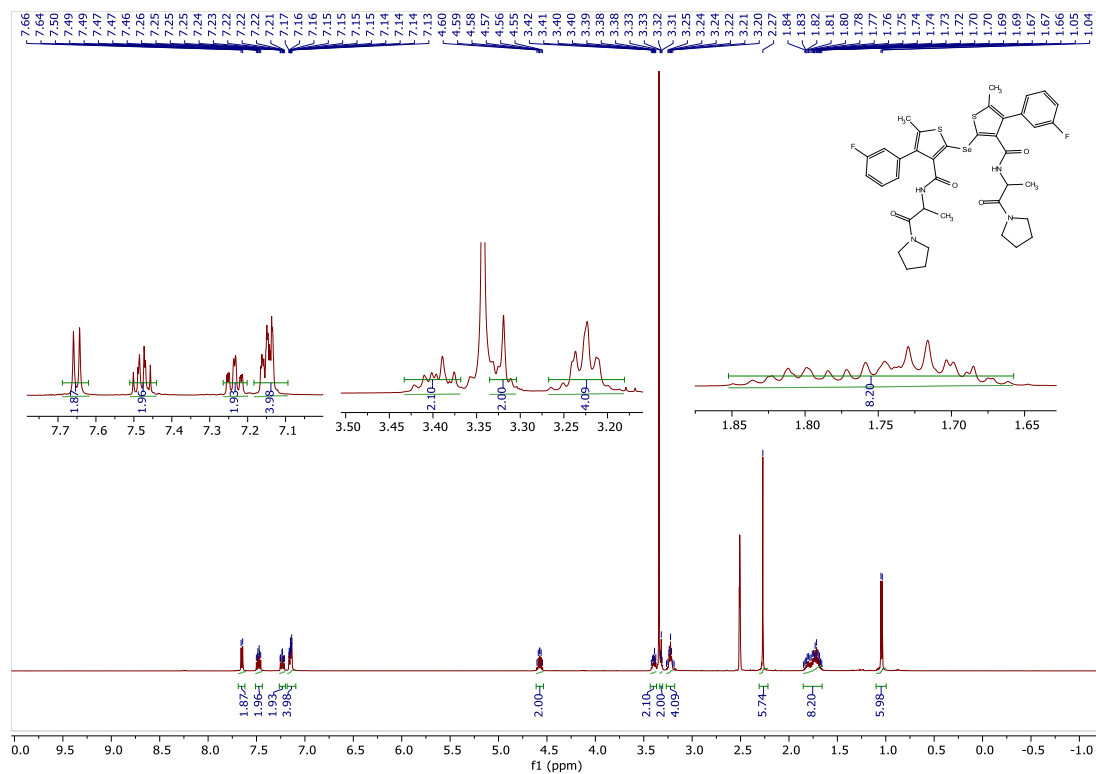

<sup>1</sup>H NMR spectrum of compound **16o** (DMSO-*d*<sub>6</sub>, 500 MHz)

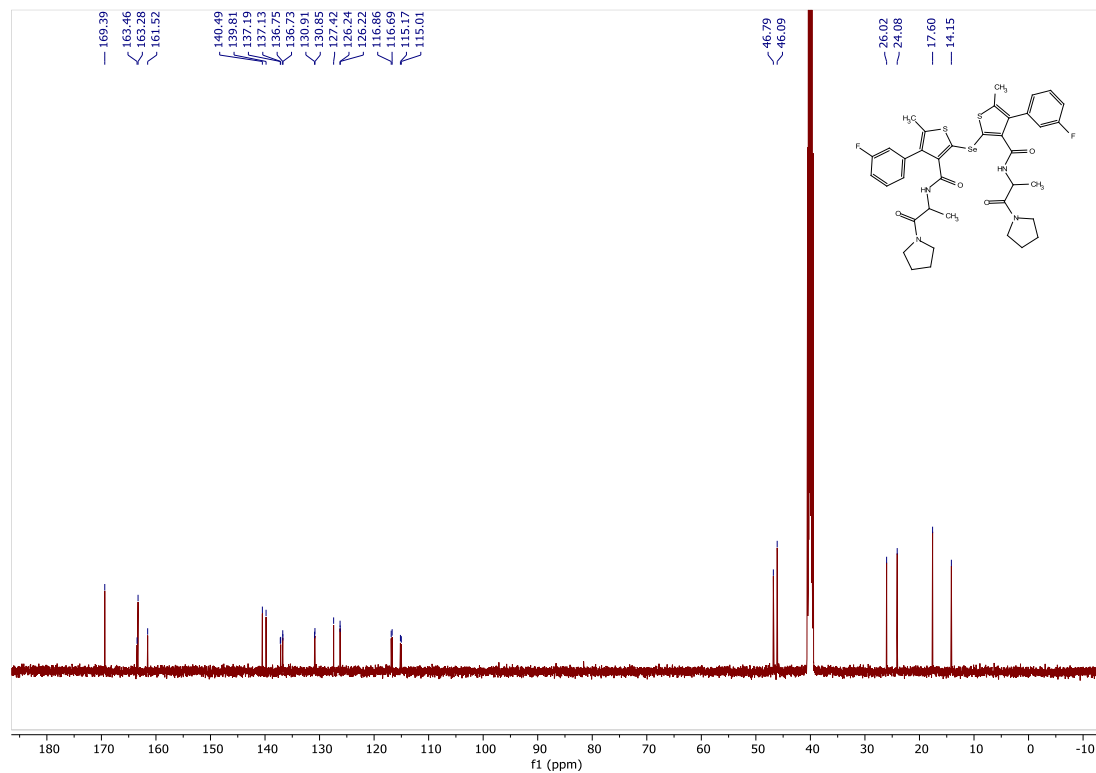

<sup>13</sup>C NMR spectrum of compound **16o** (DMSO-*d*<sub>6</sub>, 125 MHz)

**16p**: 2,2'-selenobis(4-(3-fluorophenyl)-N-(3-hydroxy-1-oxo-1-(pyrrolidin-1-yl)propan-2-yl)-5-methylthiophene-3-carboxamide)

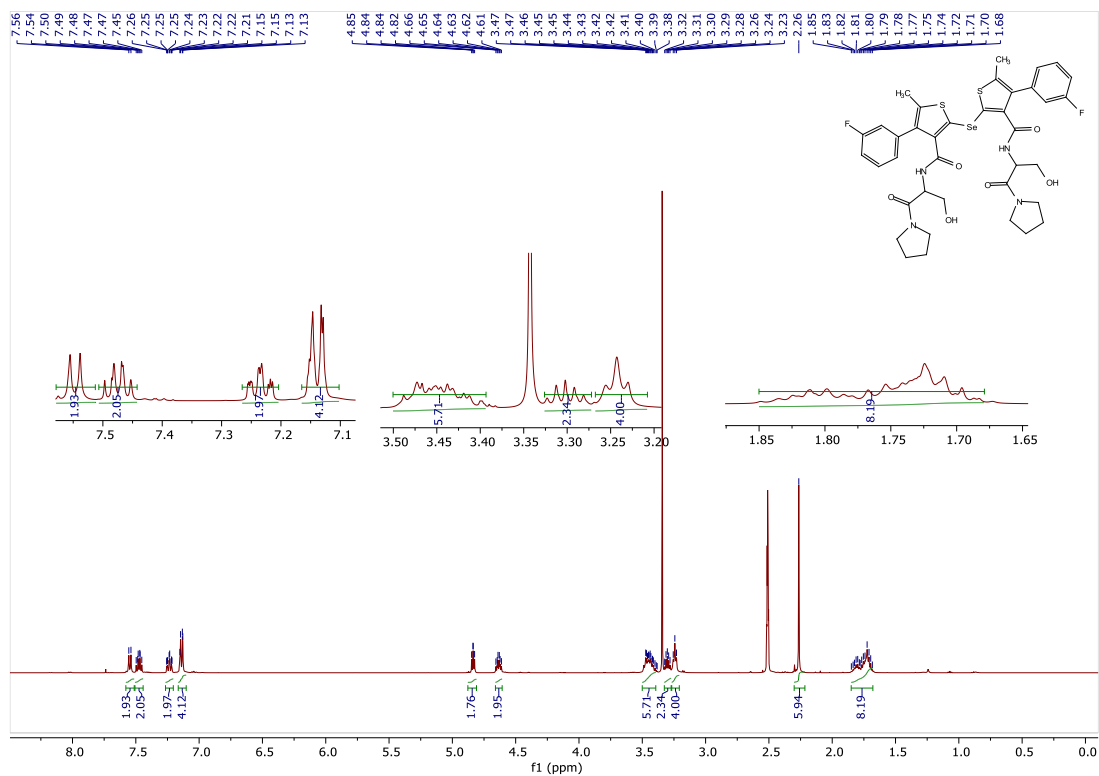

<sup>1</sup>H NMR spectrum of compound **16p** (DMSO-*d*<sub>6</sub>, 500 MHz)

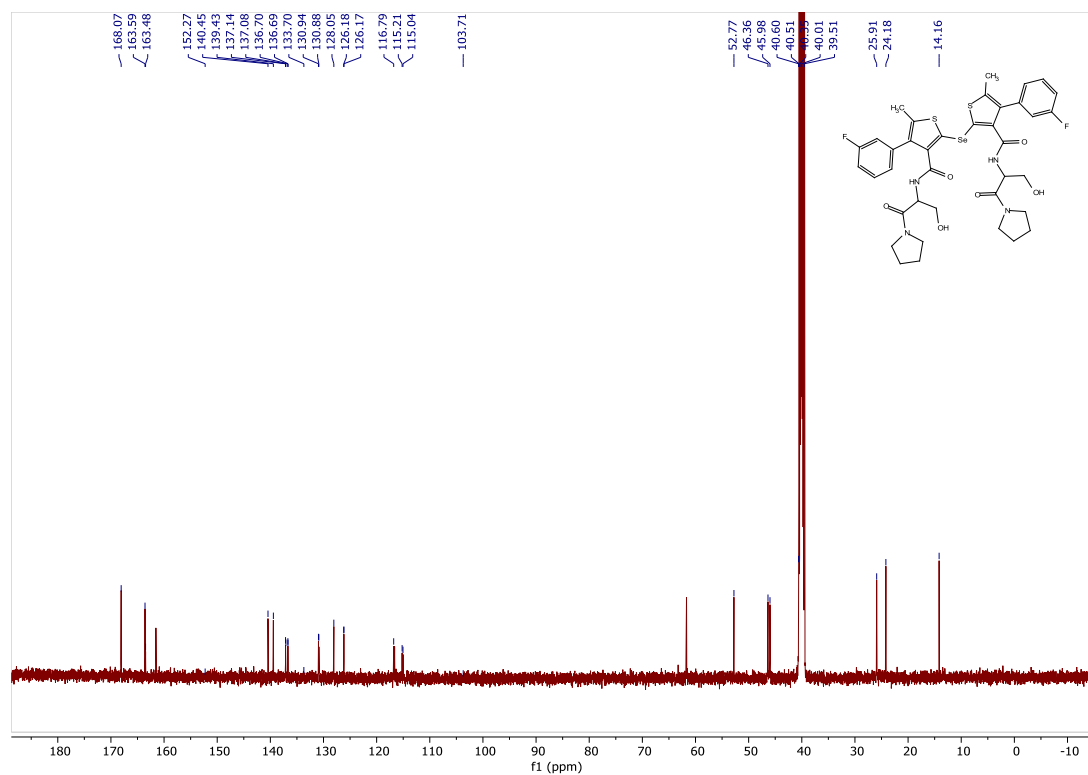

<sup>13</sup>C NMR spectrum of compound **16p** (DMSO-*d*<sub>6</sub>, 125 MHz)

**16q**: 2,2'-selenobis(4-(3-fluorophenyl)-5-methyl-N-(3-methyl-1-oxo-1-(pyrrolidin-1-yl)butan-2-yl)thiophene-3-carboxamide)

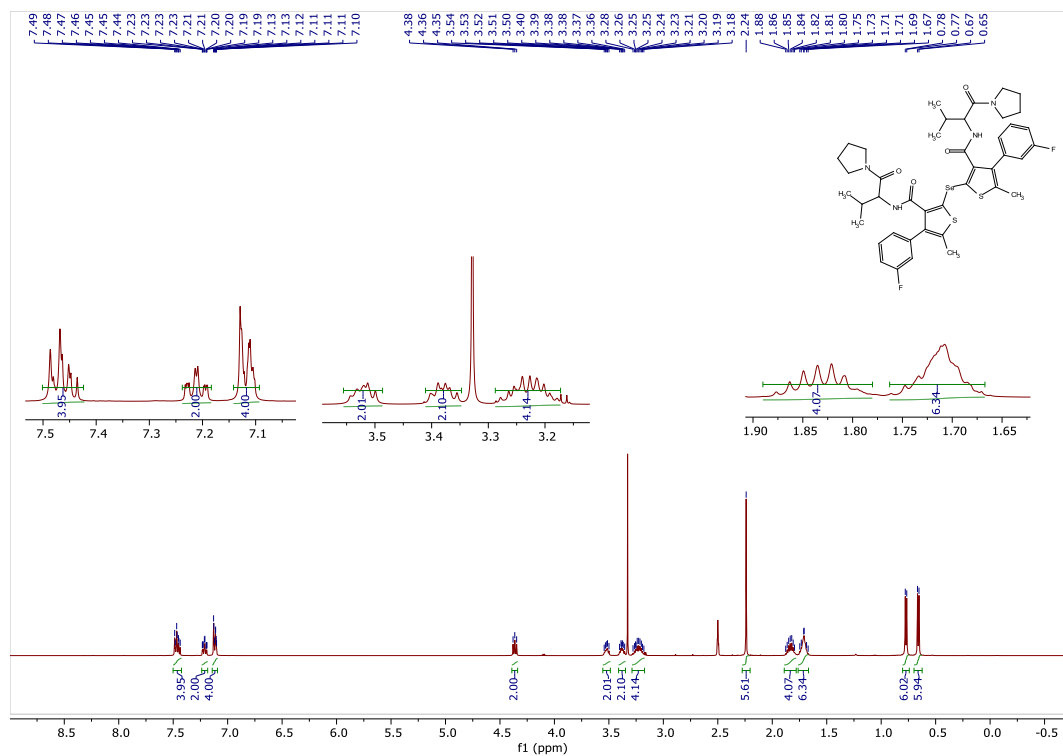

<sup>1</sup>H NMR spectrum of compound **16q** (DMSO-*d*<sub>6</sub>, 500 MHz)

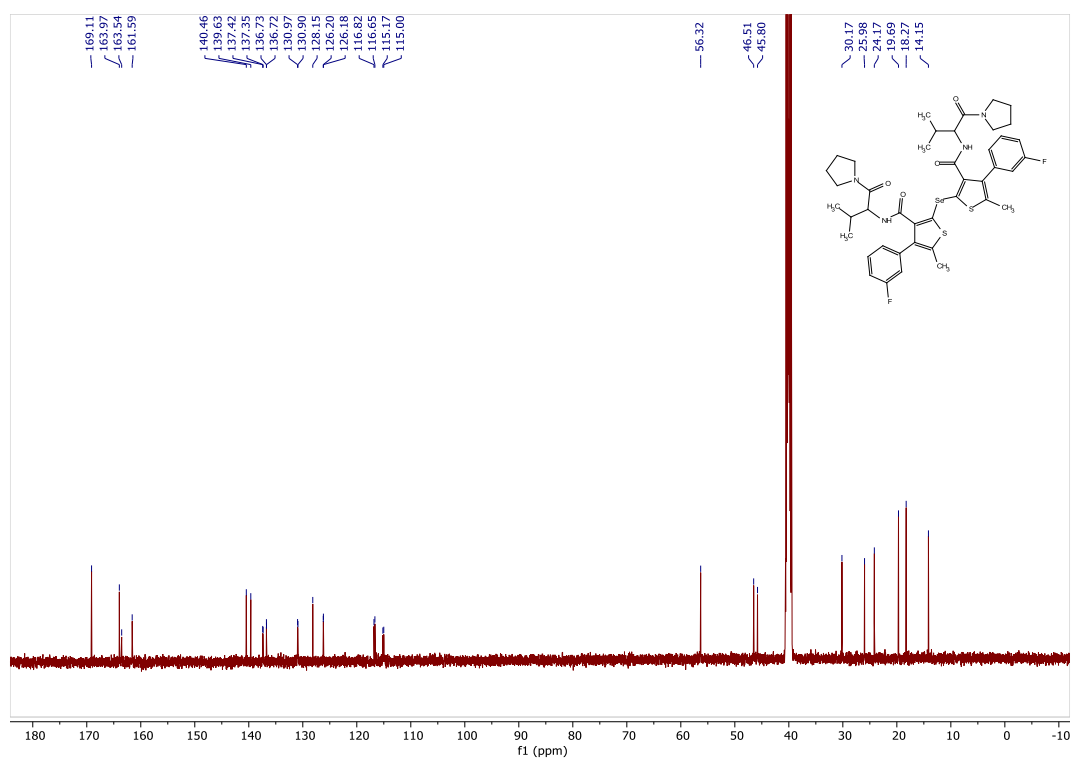

<sup>13</sup>C NMR spectrum of compound **16q** (DMSO-*d*<sub>6</sub>, 125 MHz)

**16r:** 2,2'-selenobis(4-(3-fluorophenyl)-5-methyl-N-(4-methyl-1-oxo-1-(pyrrolidin-1-yl)pentan-2-yl)thiophene-3-carboxamide)

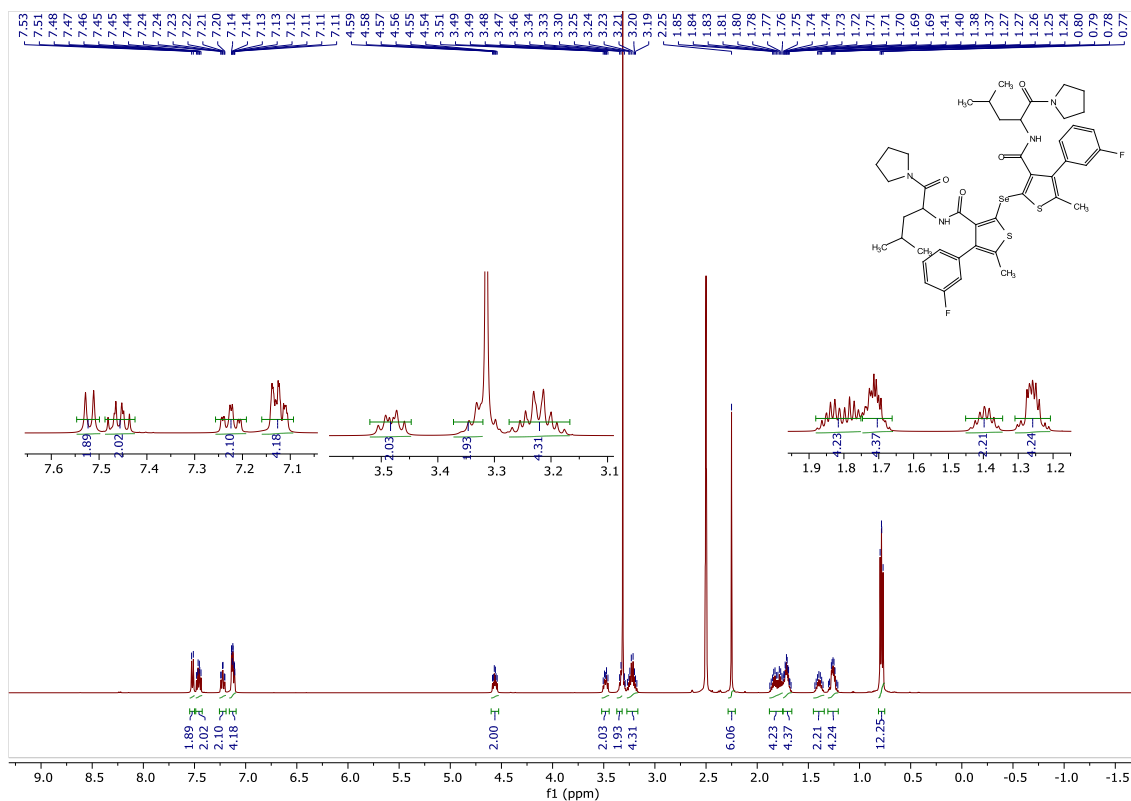

**16s: 2,2'-selenobis(4-(3-fluorophenyl)-5-methyl-N-(1-oxo-3-phenyl-1-(pyrrolidin-1-yl)propan-2-yl)thiophene-3-carboxamide)**

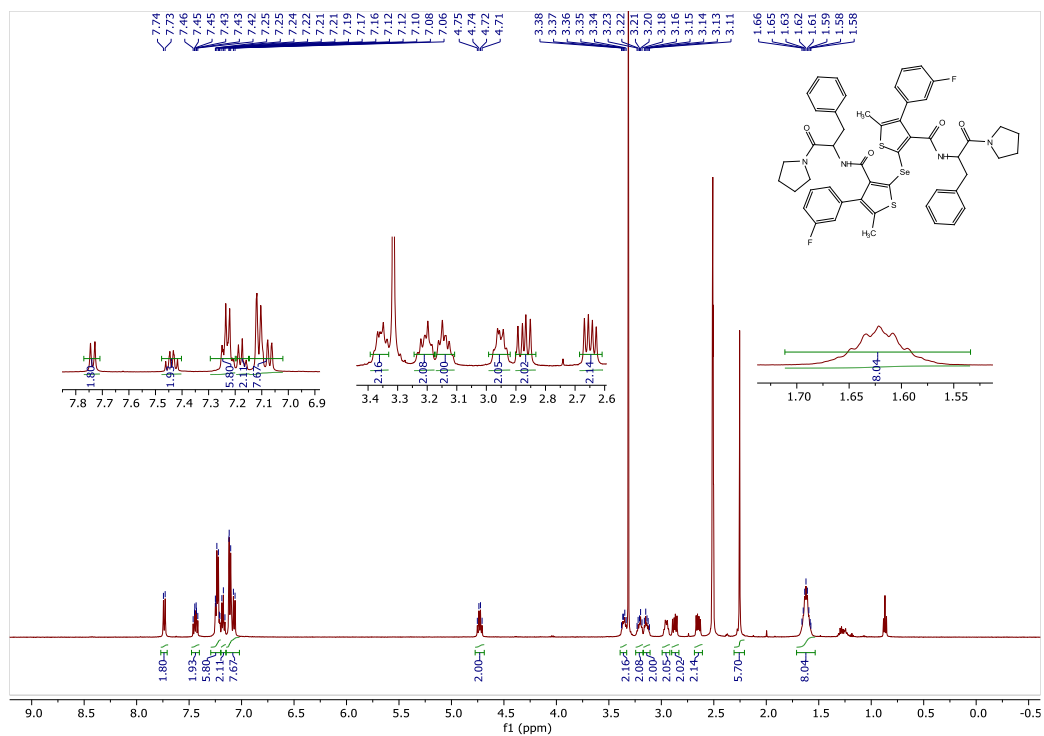

<sup>1</sup>H NMR spectrum of compound 16s (DMSO-*d*<sub>6</sub>, 500 MHz)

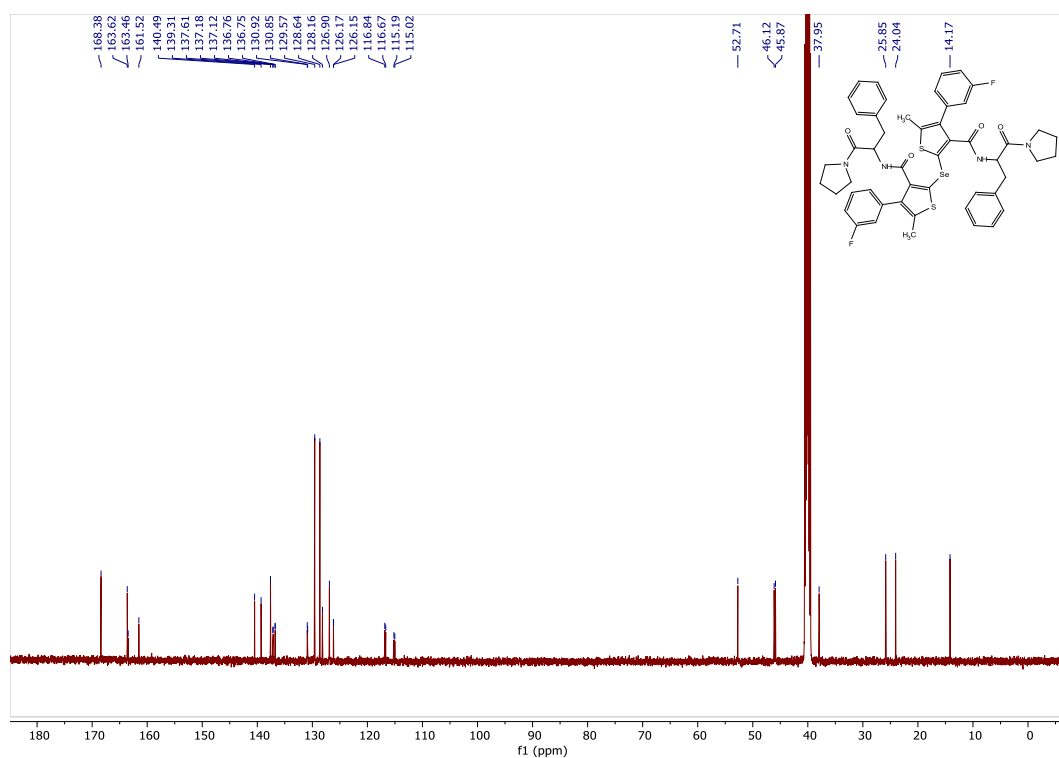

<sup>13</sup>C NMR spectrum of compound 16s (DMSO-*d*<sub>6</sub>, 125 MHz)

### 3. HPLC Method conditions

**Sample preparation:** The compound is dissolved in the mixture of acetonitrile and methanol : H<sub>2</sub>O (1:1) with the help of sonication.

**Mobile Phase:**

- A) 0.1% Formic acid: dissolve 1 ml of formic acid into 1000 ml distilled water.
- B) Acetonitrile 90% and methanol 10 %

**Chromatographic condition:**

Column: Xbridge C18 , 5 $\mu$  4.6 mm x 250 mm

Column temp: 30 °C

Sample temp: 15 °C

Flow rate: 1 ml/min

Injection volume: 10  $\mu$ L

Wavelength: 254 nm

**Gradient program:**

| Time | %B |
|------|----|
| 0.1  | 10 |
| 3    | 10 |
| 8    | 50 |
| 12   | 90 |
| 14   | 90 |
| 16   | 50 |
| 18   | 10 |
| 20   | 10 |

## 4. HPLC results

### Compound 16b

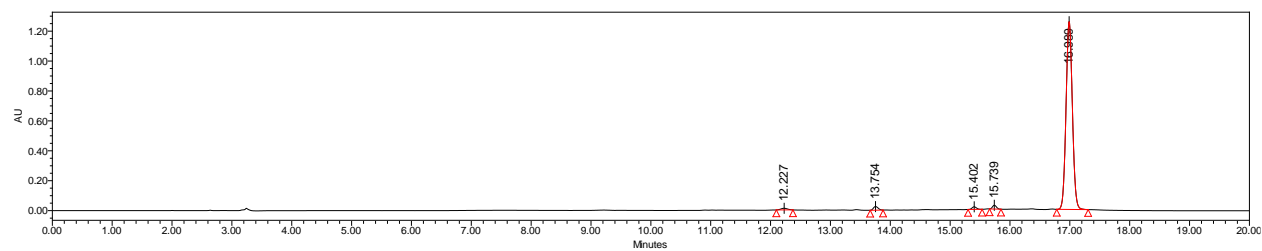

| Entry | Name       | Retention Time | Area    | % Area |
|-------|------------|----------------|---------|--------|
| 1     |            | 12.227         | 86714   | 0.90   |
| 2     |            | 13.754         | 132691  | 1.38   |
| 3     |            | 15.402         | 87153   | 0.90   |
| 4     |            | 15.739         | 115803  | 1.20   |
| 5     | <b>16b</b> | 16.989         | 9221073 | 95.62  |

## Compound 16e

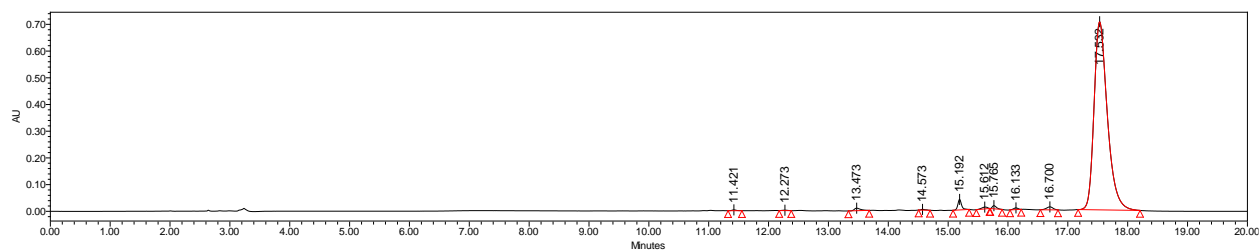

| Entry | Name       | Retention Time | Area     | % Area |
|-------|------------|----------------|----------|--------|
| 1     |            | 11.421         | 15541    | 0.14   |
| 2     |            | 12.273         | 10254    | 0.09   |
| 3     |            | 13.473         | 69326    | 0.61   |
| 4     |            | 14.573         | 16049    | 0.14   |
| 5     |            | 15.192         | 170497   | 1.50   |
| 6     |            | 15.612         | 47487    | 0.42   |
| 7     |            | 15.765         | 57180    | 0.50   |
| 8     |            | 16.133         | 32912    | 0.29   |
| 9     |            | 16.700         | 84647    | 0.74   |
| 10    | <b>16e</b> | 17.532         | 10858832 | 95.57  |



## Compound **16j**

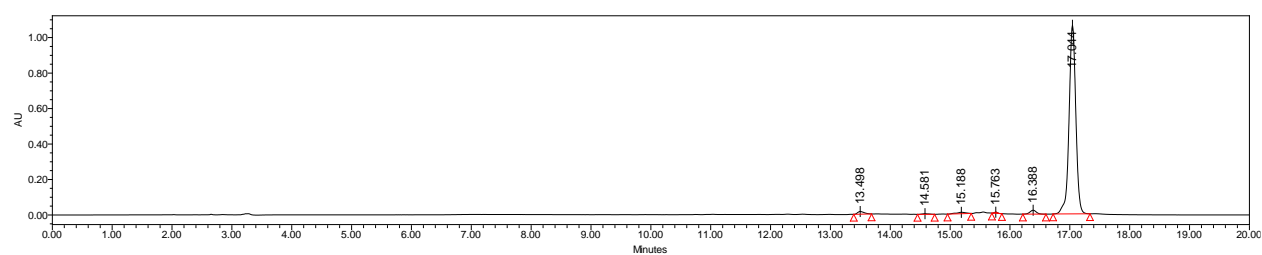

| Entry | Name       | Retention Time | Area    | % Area |
|-------|------------|----------------|---------|--------|
| 1     |            | 13.498         | 117353  | 1.34   |
| 2     |            | 14.581         | 28007   | 0.32   |
| 3     |            | 15.188         | 93077   | 1.06   |
| 4     |            | 15.763         | 25387   | 0.29   |
| 5     |            | 16.388         | 161061  | 1.84   |
| 6     | <b>16j</b> | 17.044         | 8335716 | 95.15  |

## Compound **16n**

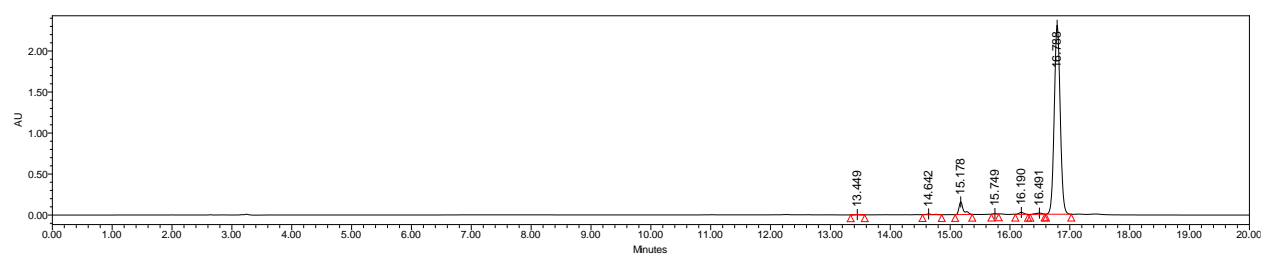

| Entry | Name       | Retention Time | Area     | % Area |
|-------|------------|----------------|----------|--------|
| 1     |            | 13.449         | 22370    | 0.13   |
| 2     |            | 14.642         | 66920    | 0.39   |
| 3     |            | 15.178         | 805153   | 4.72   |
| 4     |            | 15.749         | 26384    | 0.15   |
| 5     |            | 16.190         | 130324   | 0.76   |
| 6     |            | 16.491         | 110618   | 0.65   |
| 7     | <b>16n</b> | 16.788         | 15901504 | 93.19  |

## Compound **16o**

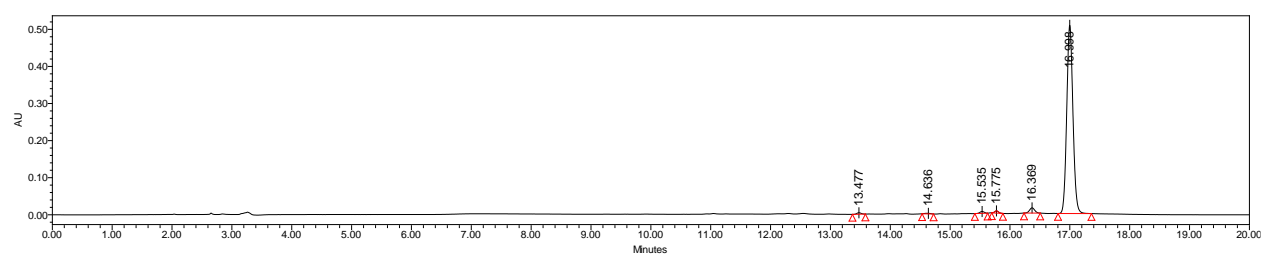

| Entry | Name       | Retention Time | Area    | % Area |
|-------|------------|----------------|---------|--------|
| 1     |            | 13.477         | 19551   | 0.51   |
| 2     |            | 14.636         | 11153   | 0.29   |
| 3     |            | 15.535         | 25324   | 0.66   |
| 4     |            | 15.775         | 25572   | 0.67   |
| 5     |            | 16.369         | 84272   | 2.21   |
| 6     | <b>16o</b> | 16.998         | 3650214 | 95.65  |
